# Supplementary material
Source: PubMed Central journal article supplement (PMC2667337)

**MSK data  
Method A  
all stages**

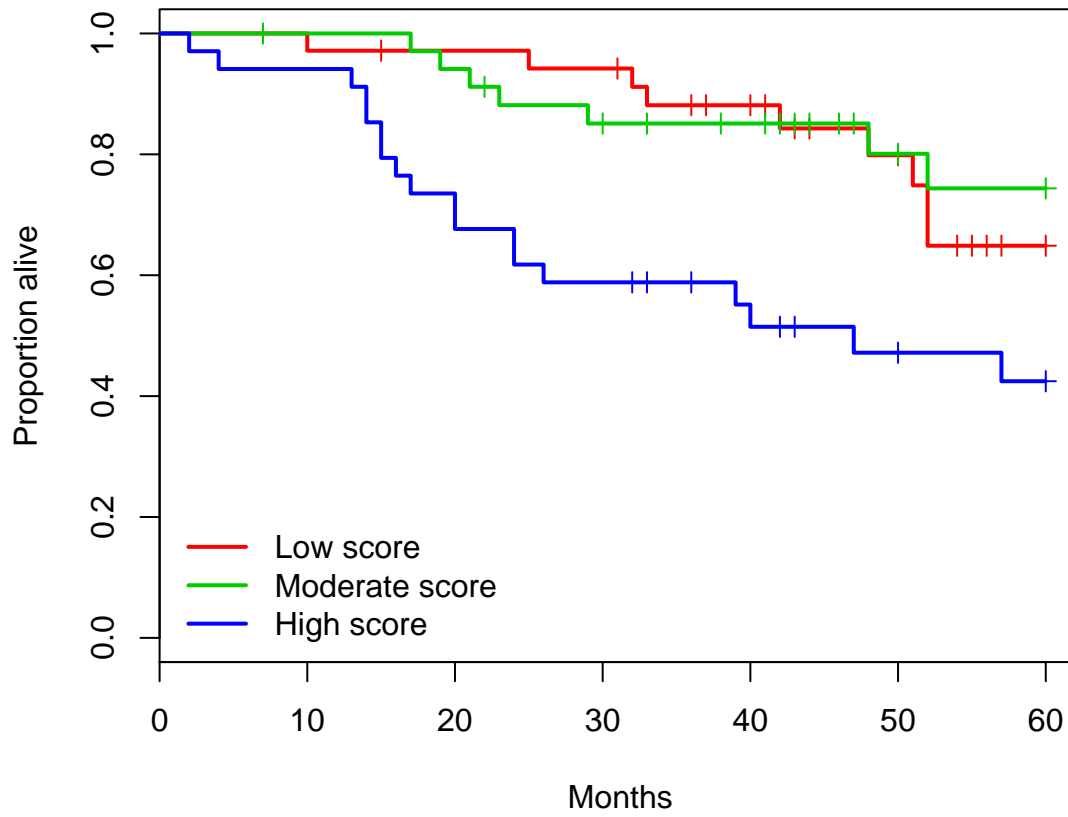

**MSK data  
Method A  
stage 1 only**

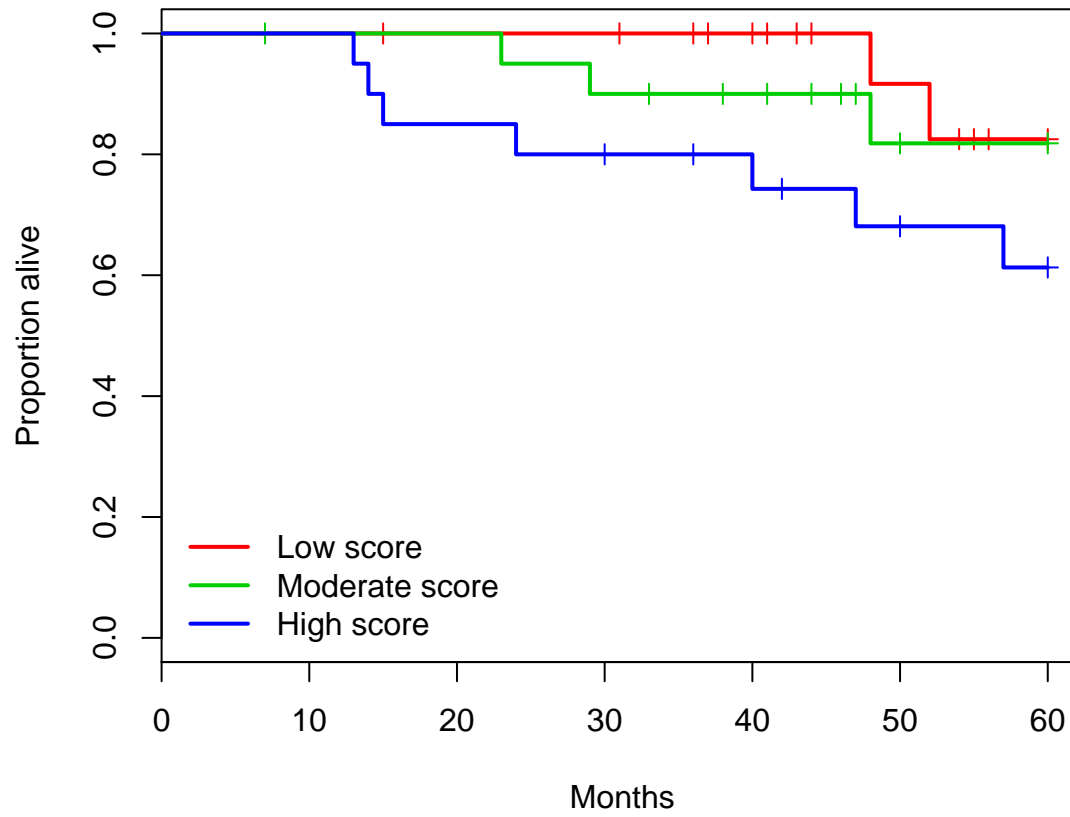

**MSK data**  
**Method A (with covariates)**  
**all stages**

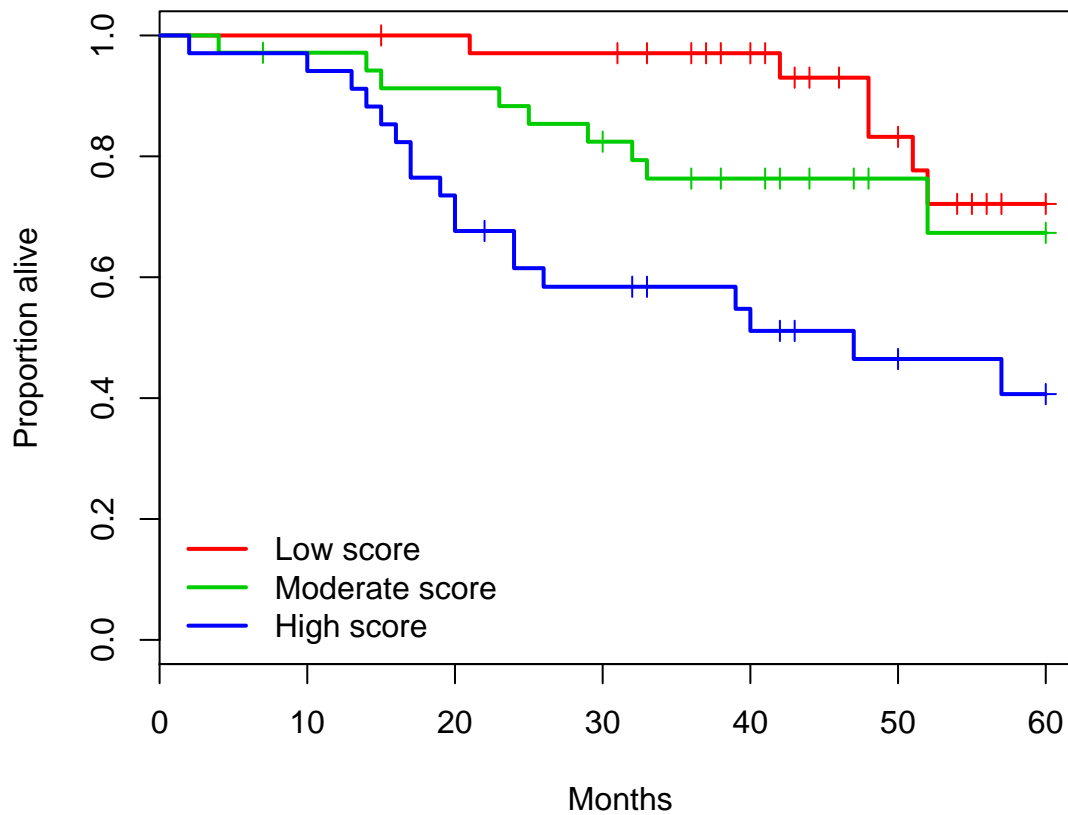

**MSK data**  
**Method A (with covariates)**  
**stage 1 only**

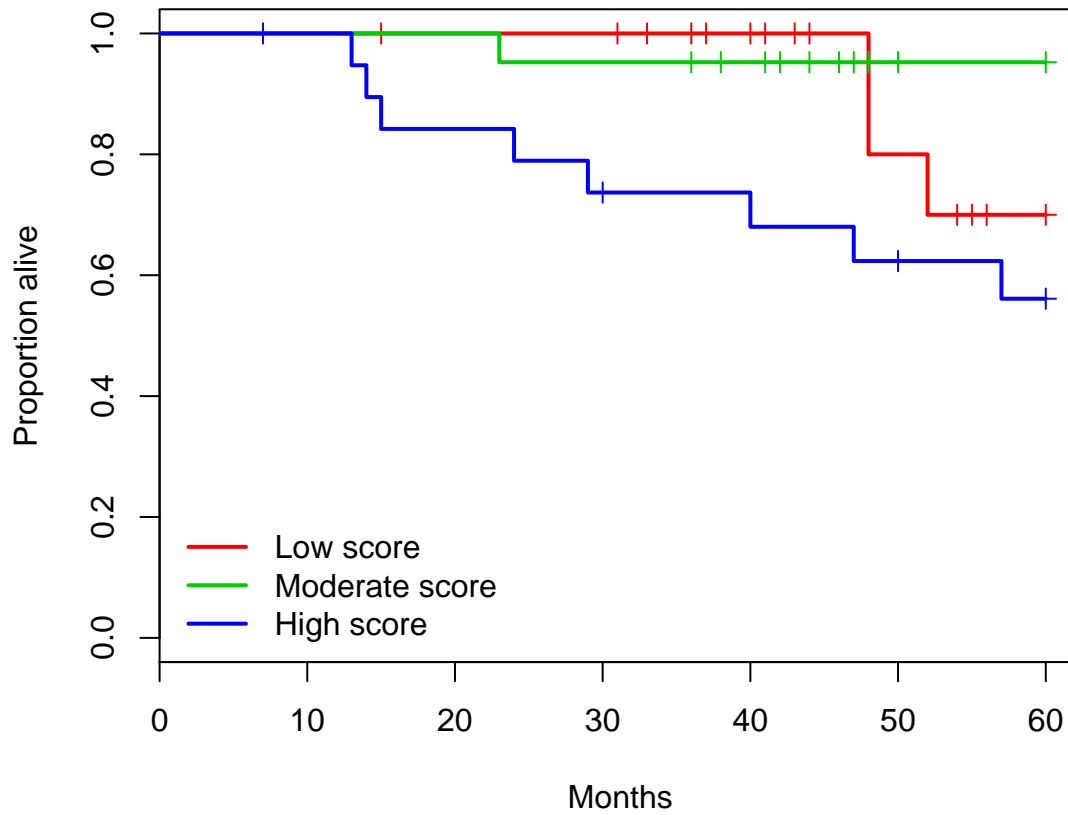

**MSK data  
Method B  
all stages**

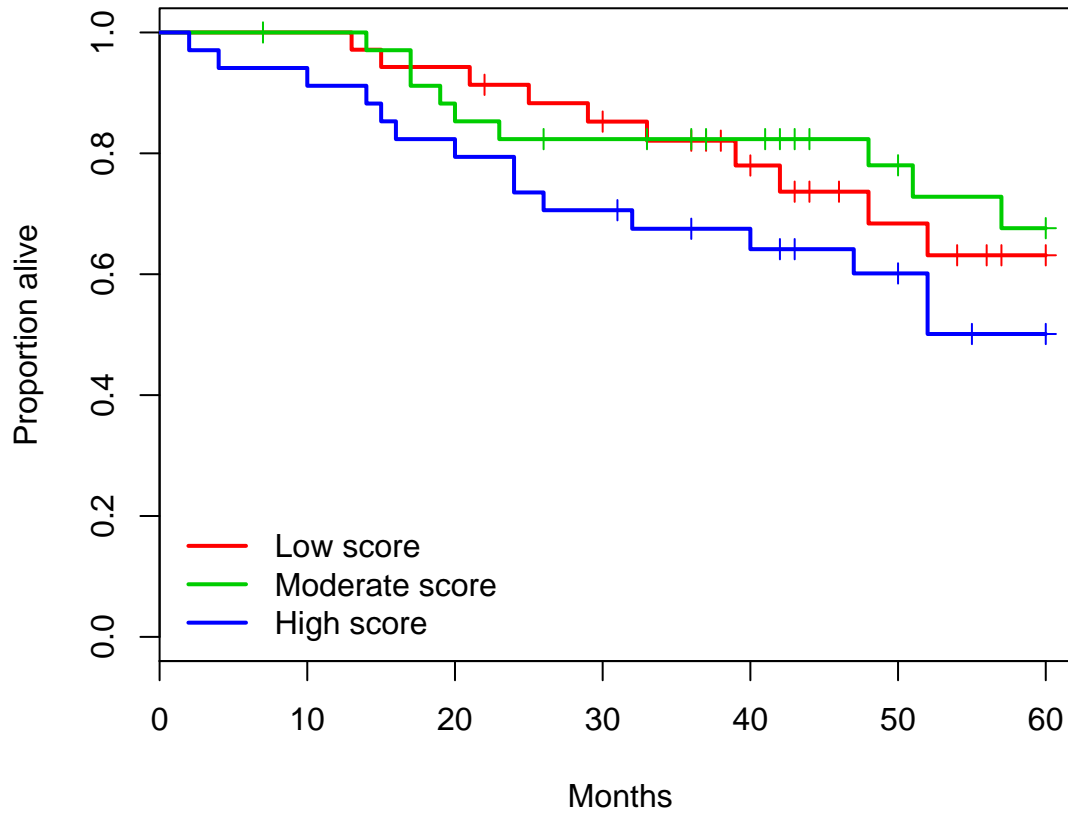

**MSK data  
Method B  
stage 1 only**

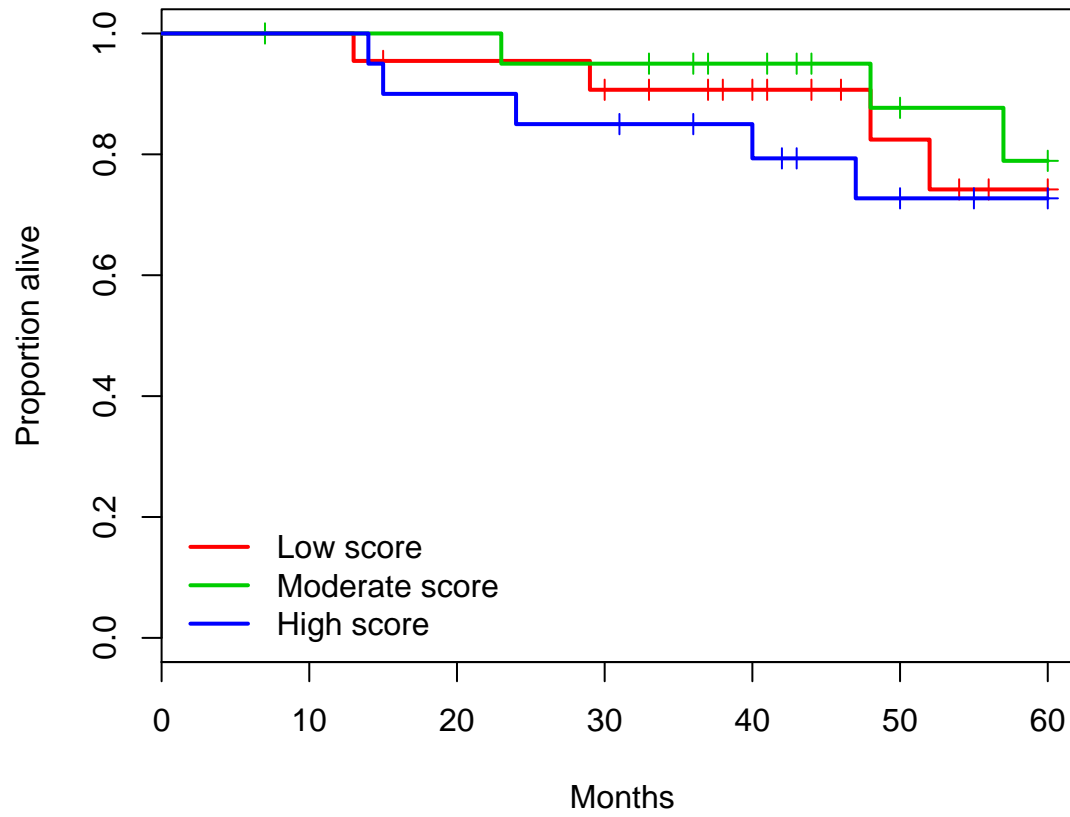

**MSK data  
Method C  
all stages**

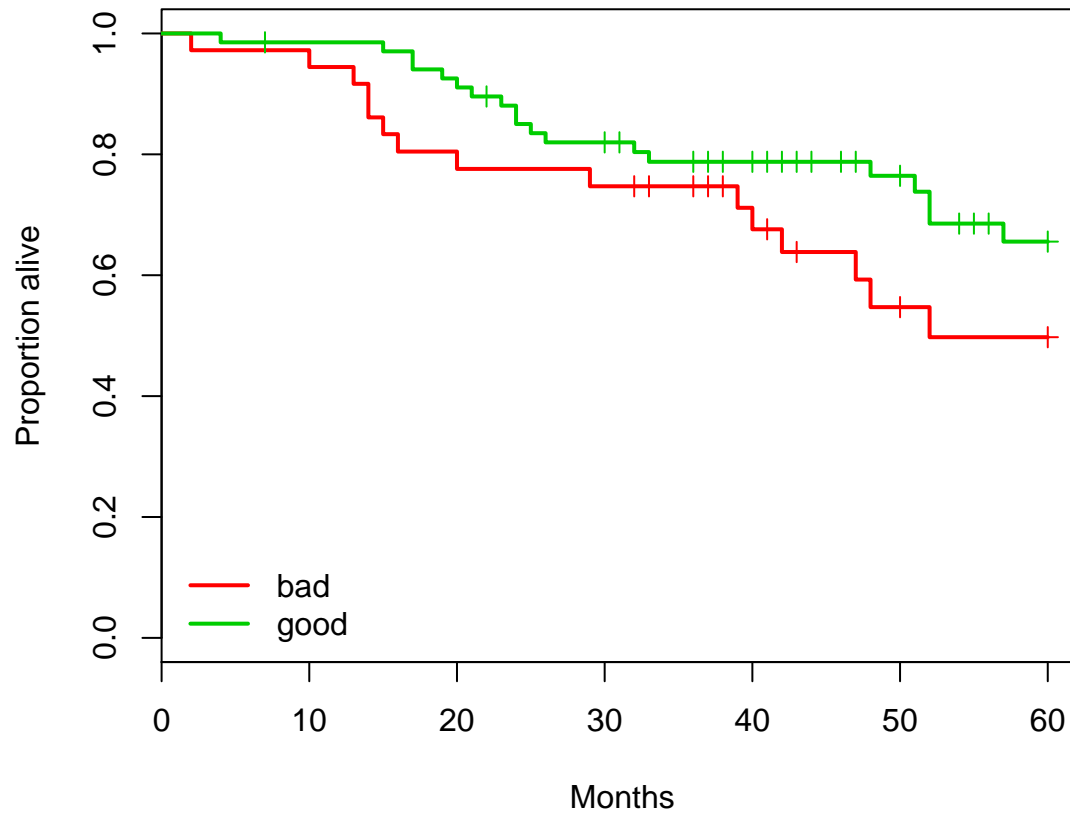

**MSK data  
Method C  
stage 1 only**

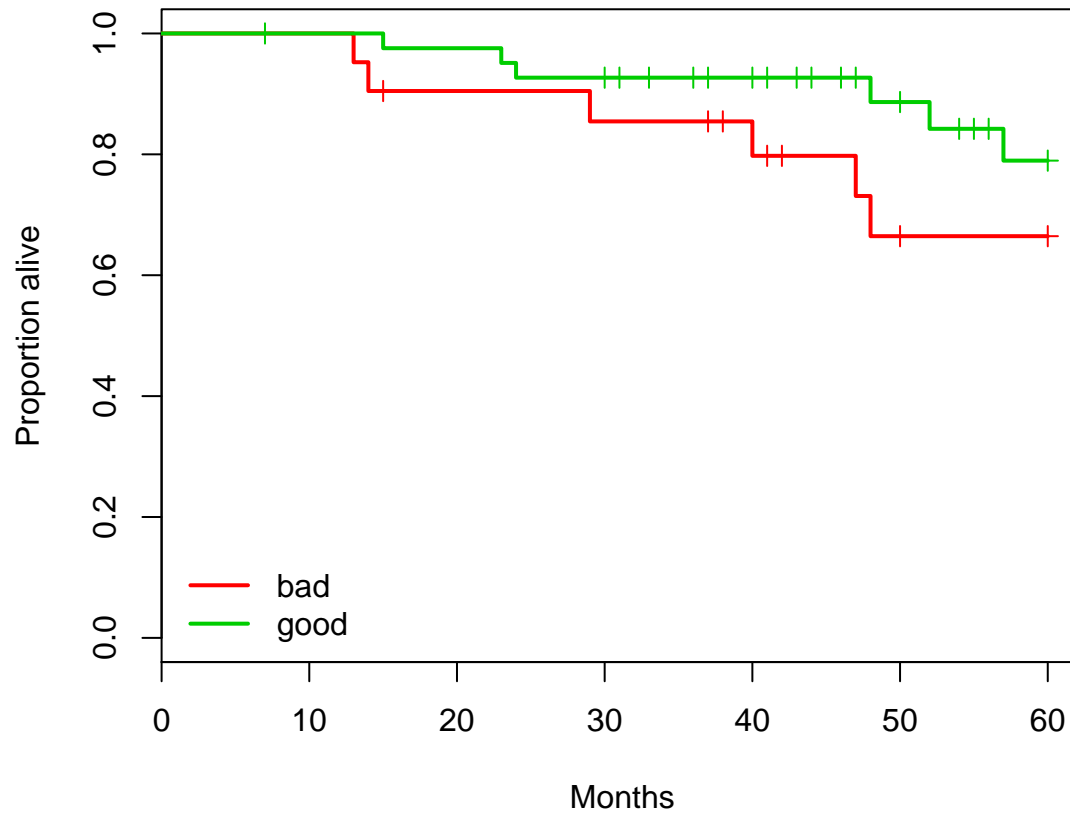



**MSK data  
Method D  
all stages**

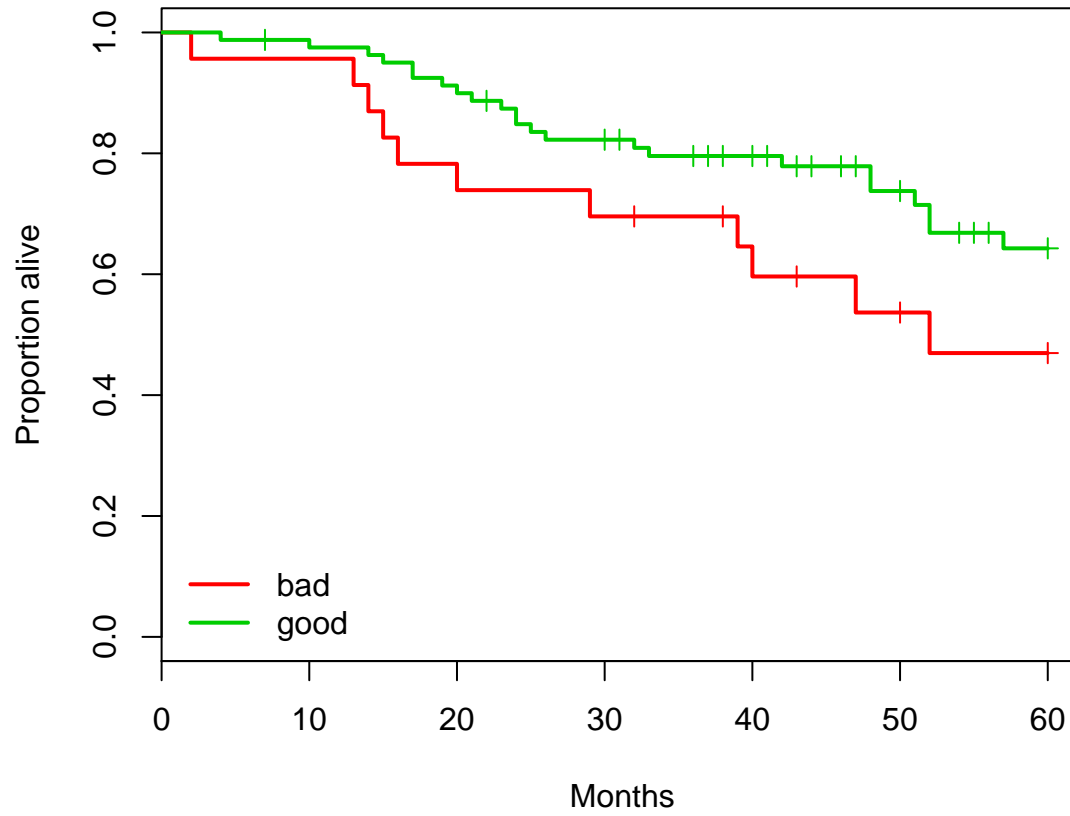

**MSK data  
Method D  
stage 1 only**

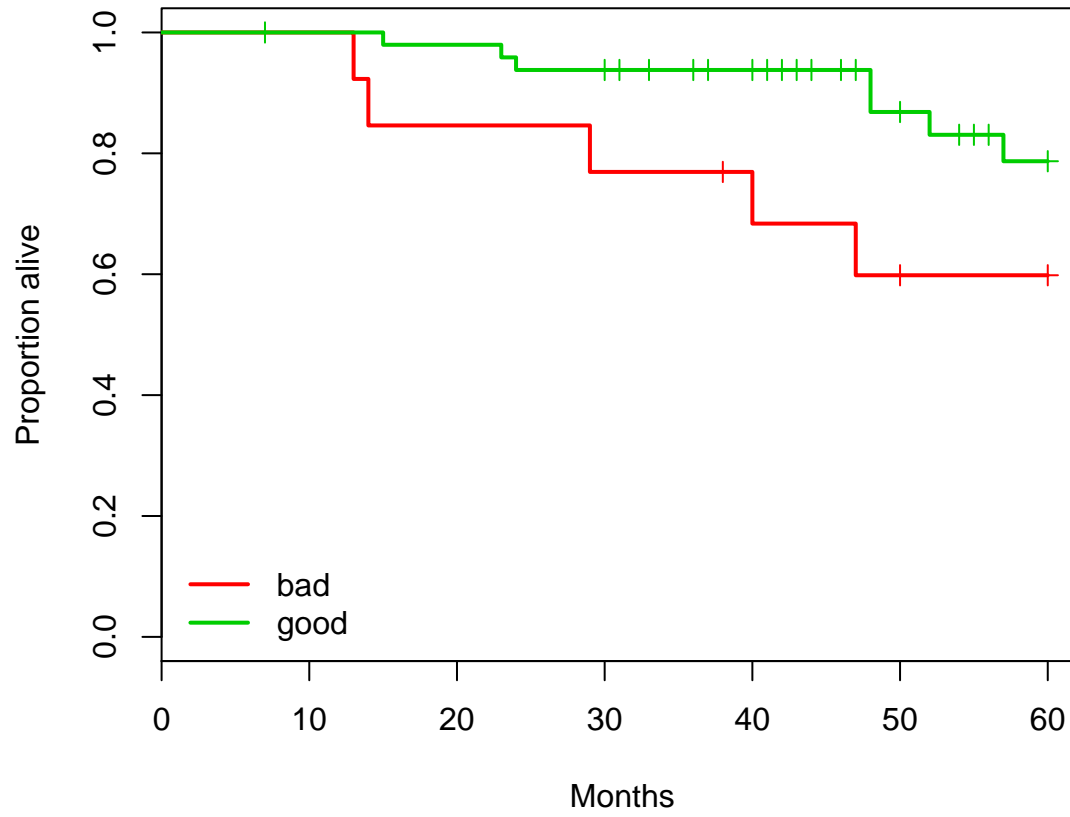

**MSK data  
Method E  
all stages**

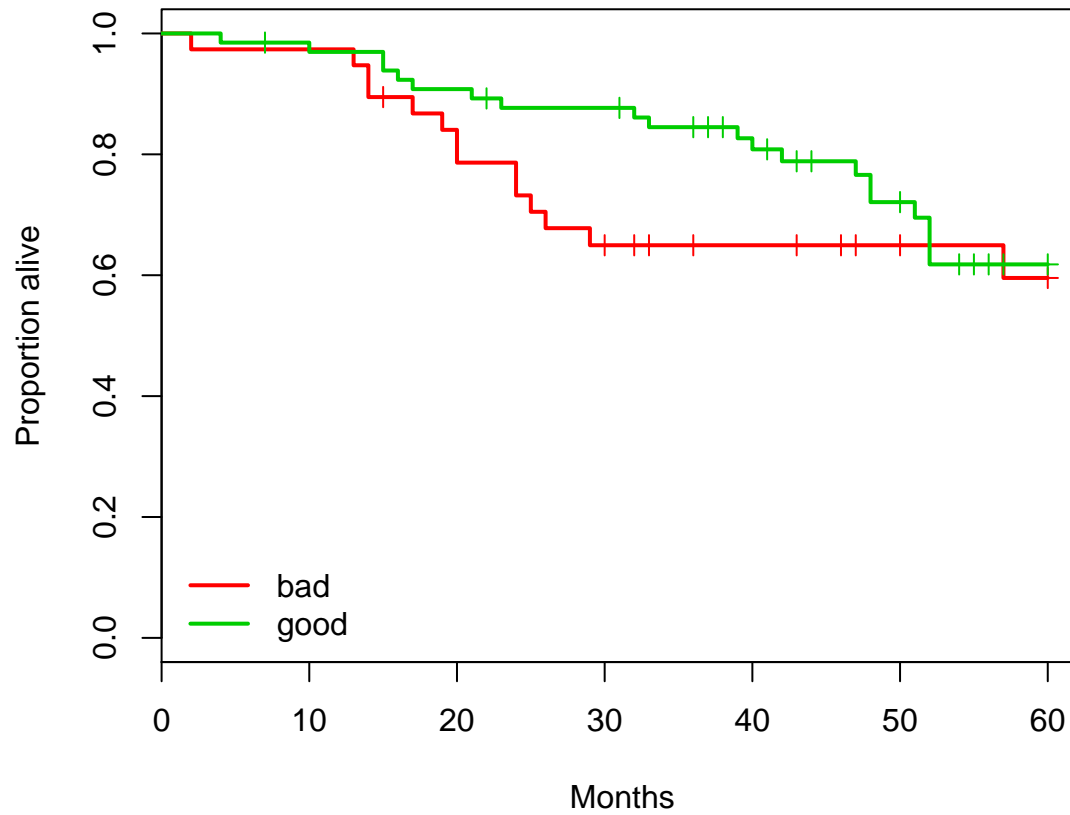

**MSK data  
Method E  
stage 1 only**

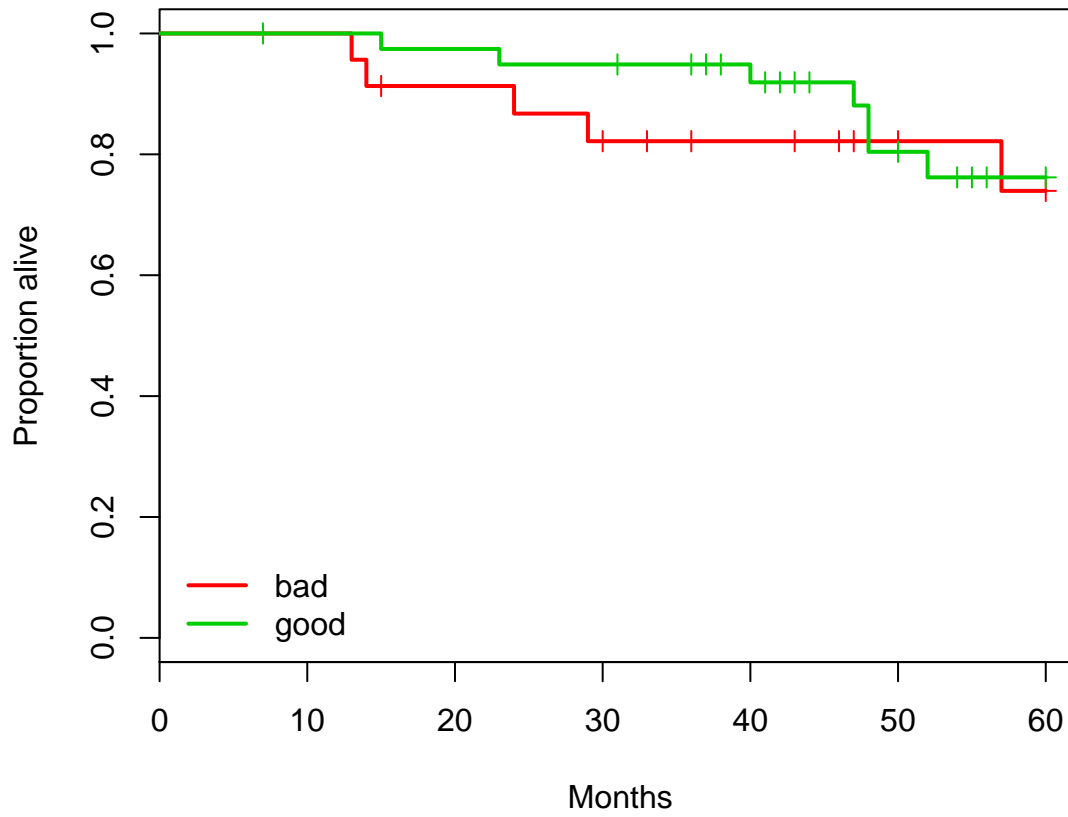

**MSK data  
Method F  
all stages**

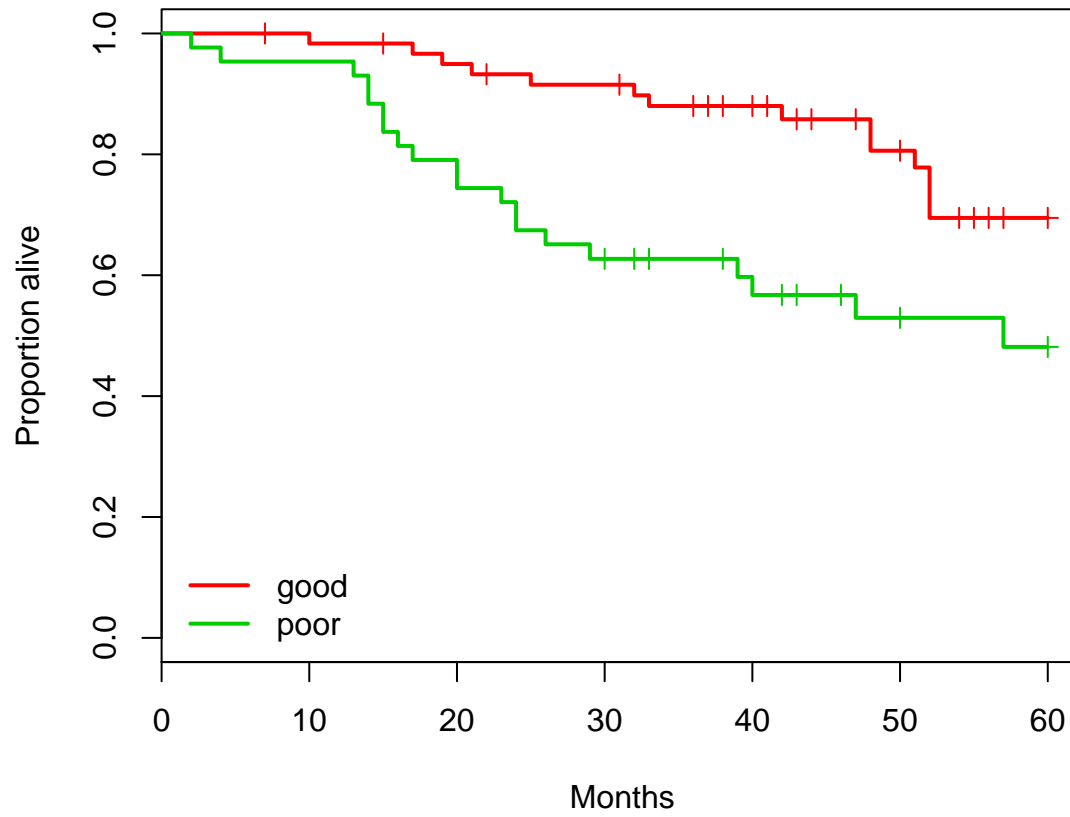

**MSK data  
Method F  
stage 1 only**

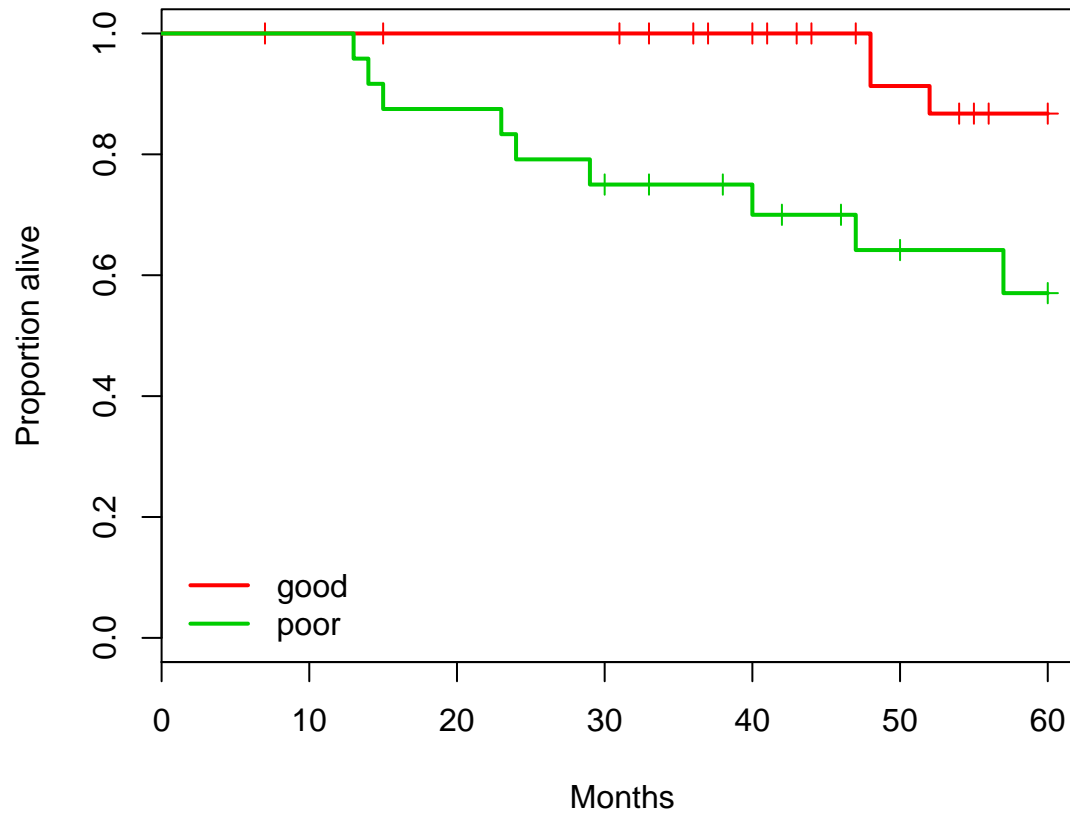

**MSK data  
Method G  
all stages**

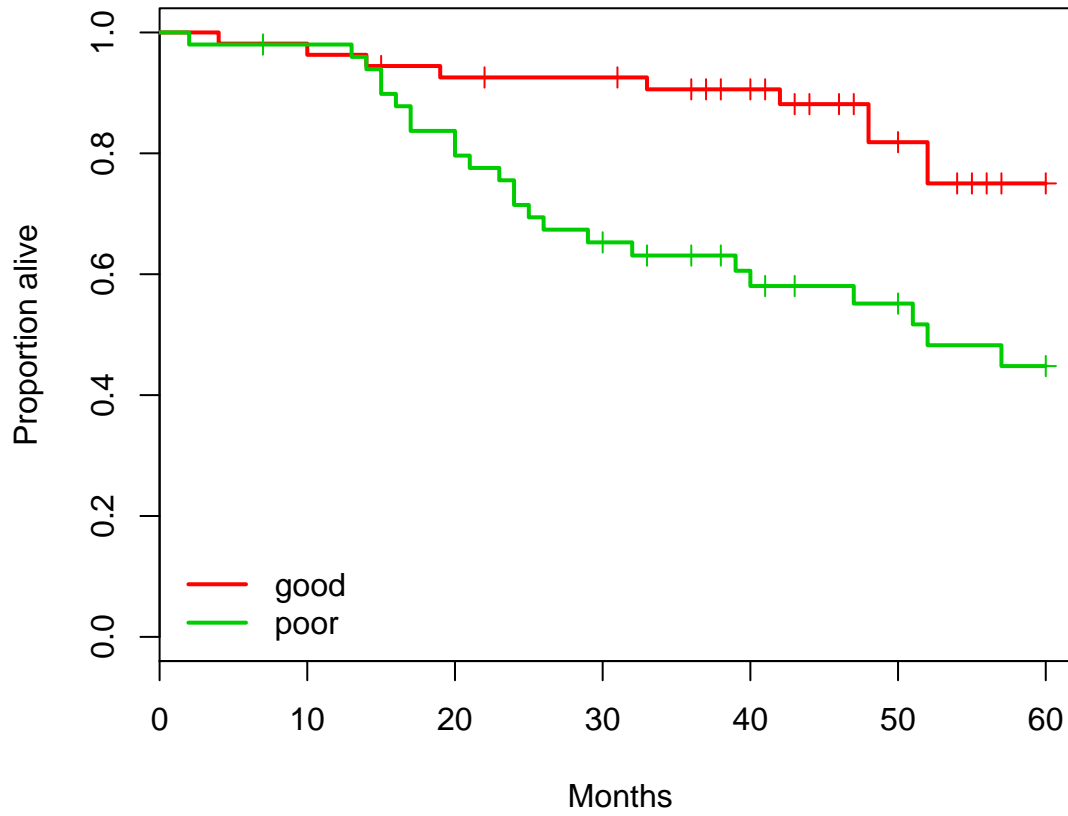

**MSK data  
Method G  
stage 1 only**

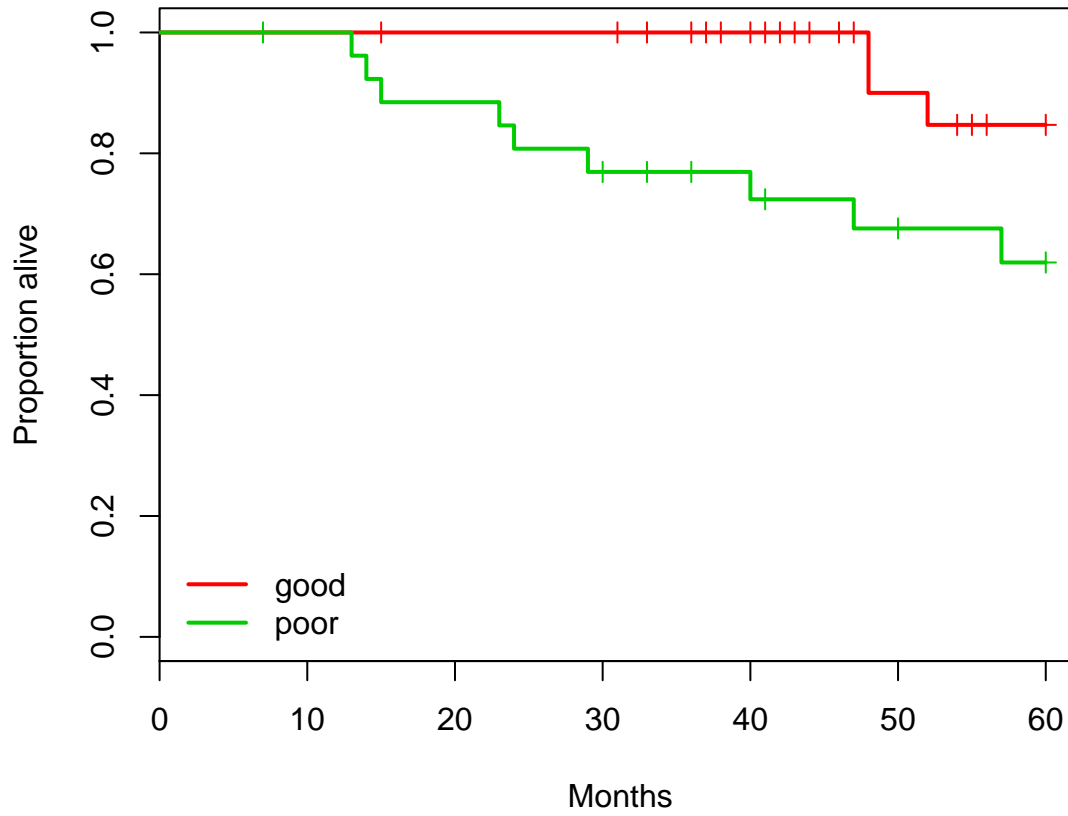



**MSK data  
Method H  
all stages**

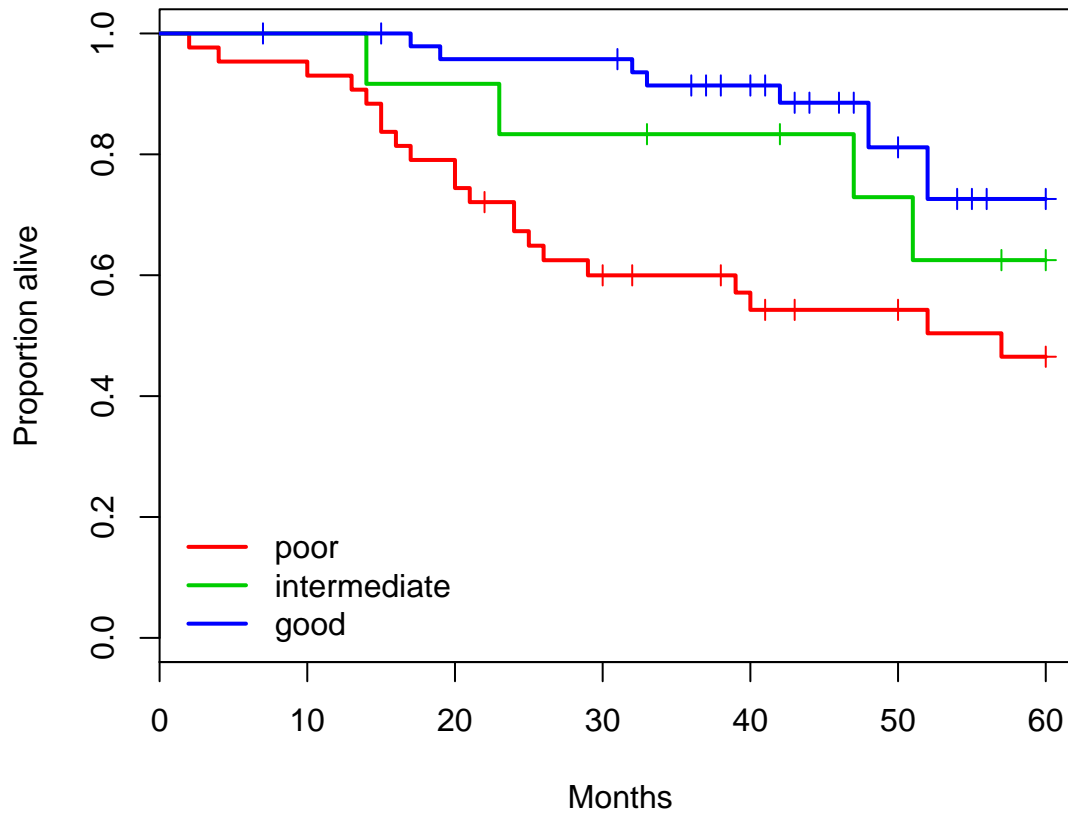

**MSK data  
Method H  
stage 1 only**

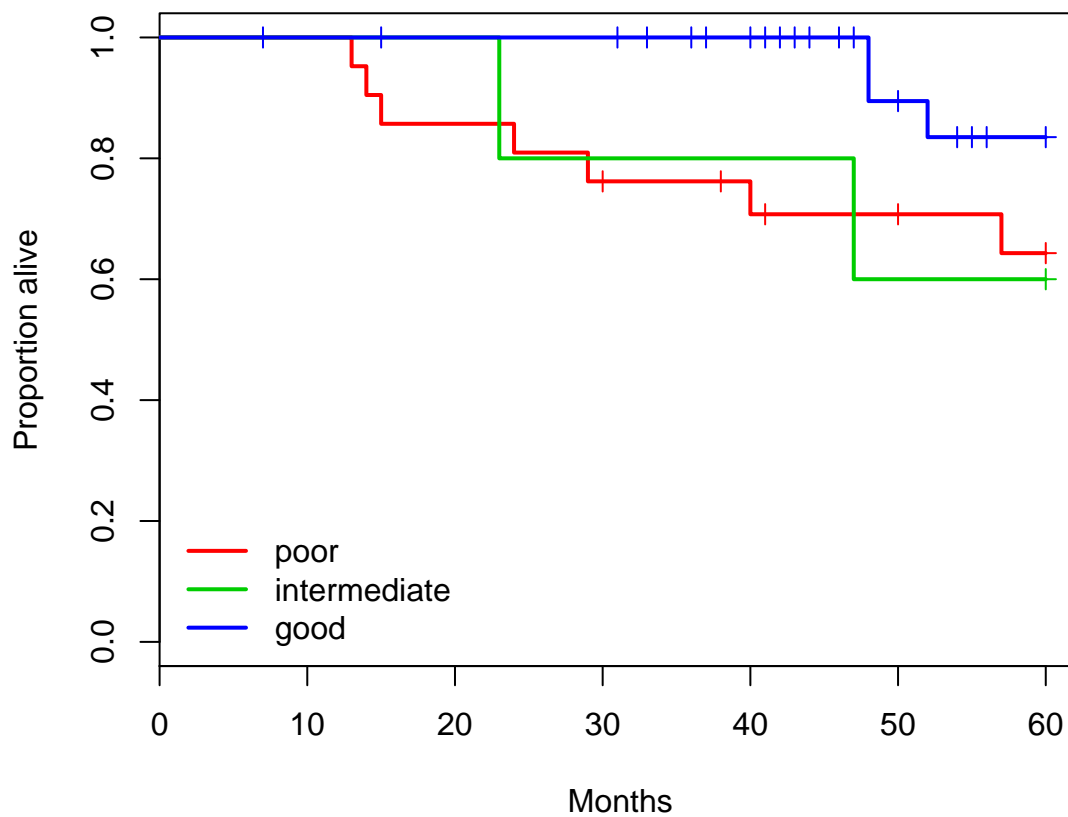

**CAN/DF data  
Method A  
all stages**

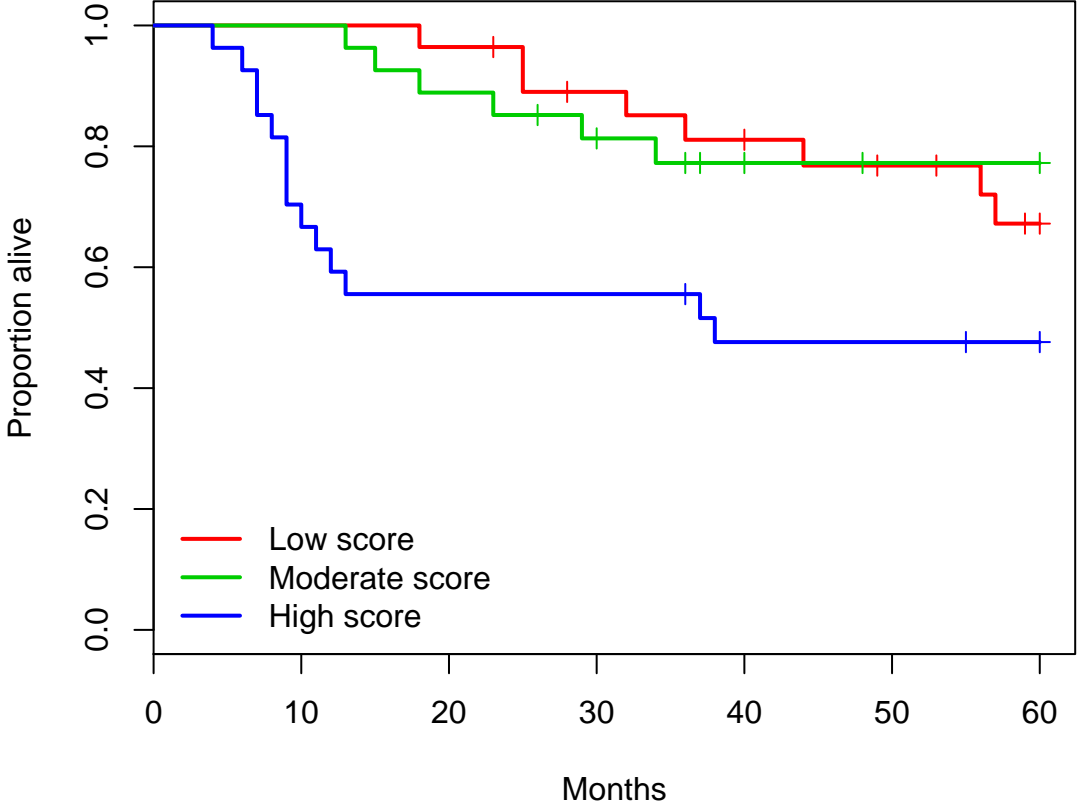

**CAN/DF data  
Method A  
stage 1 only**

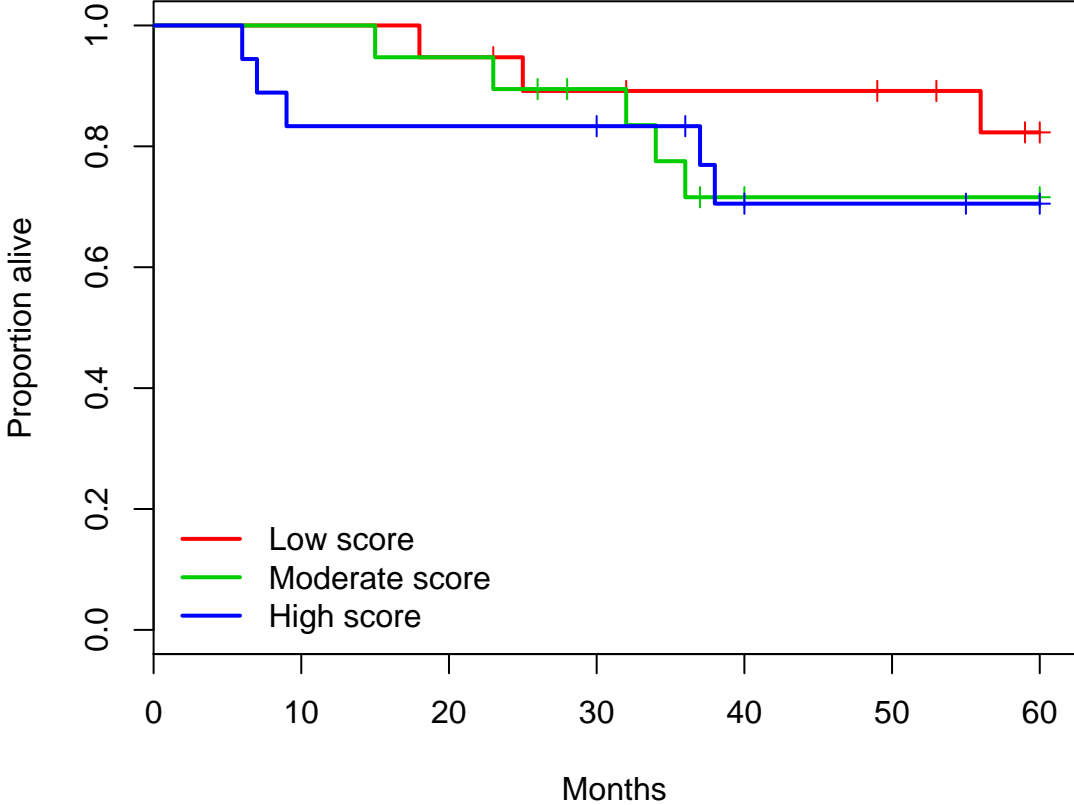

**CAN/DF data**  
**Method A (with covariates)**  
**all stages**

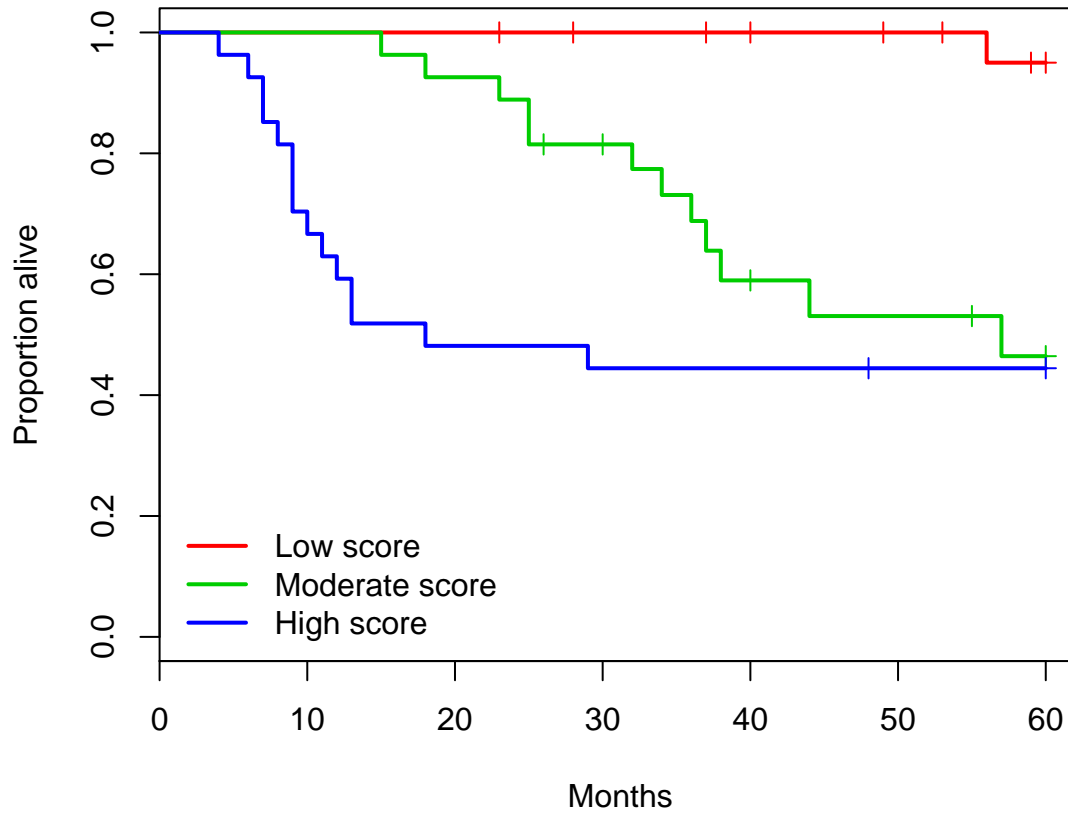

**CAN/DF data**  
**Method A (with covariates)**  
**stage 1 only**

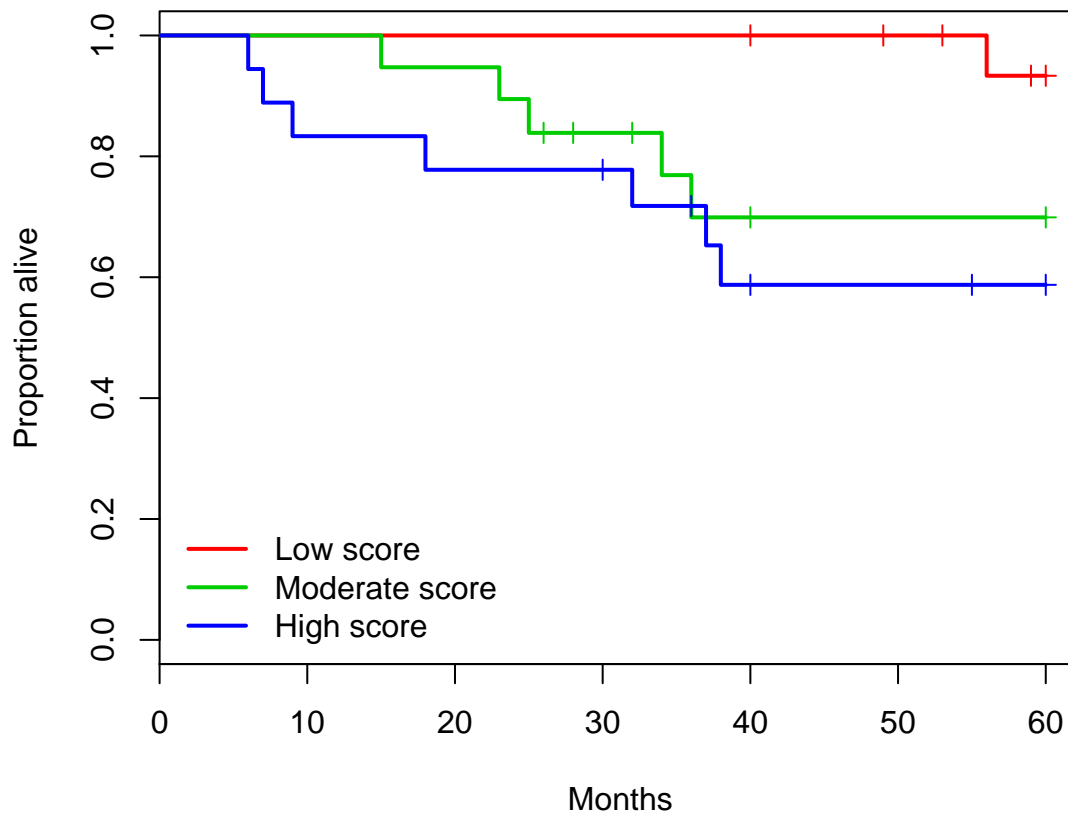

**CAN/DF data  
Method B  
all stages**

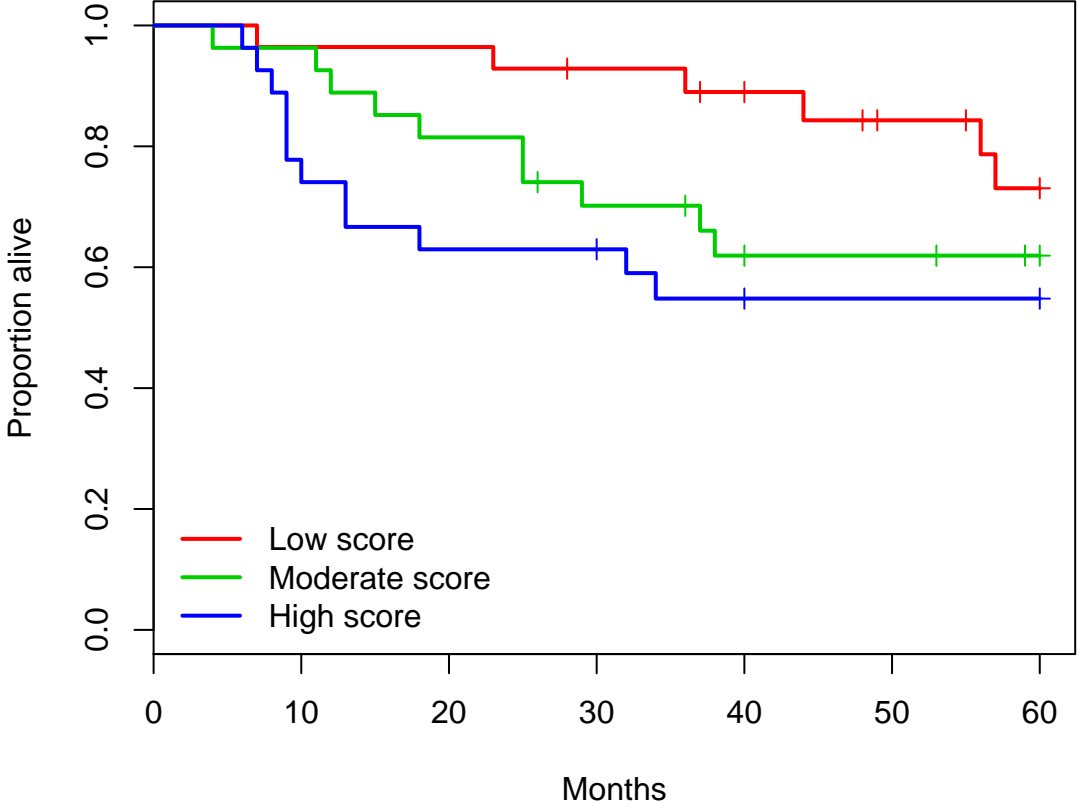

**CAN/DF data  
Method B  
stage 1 only**

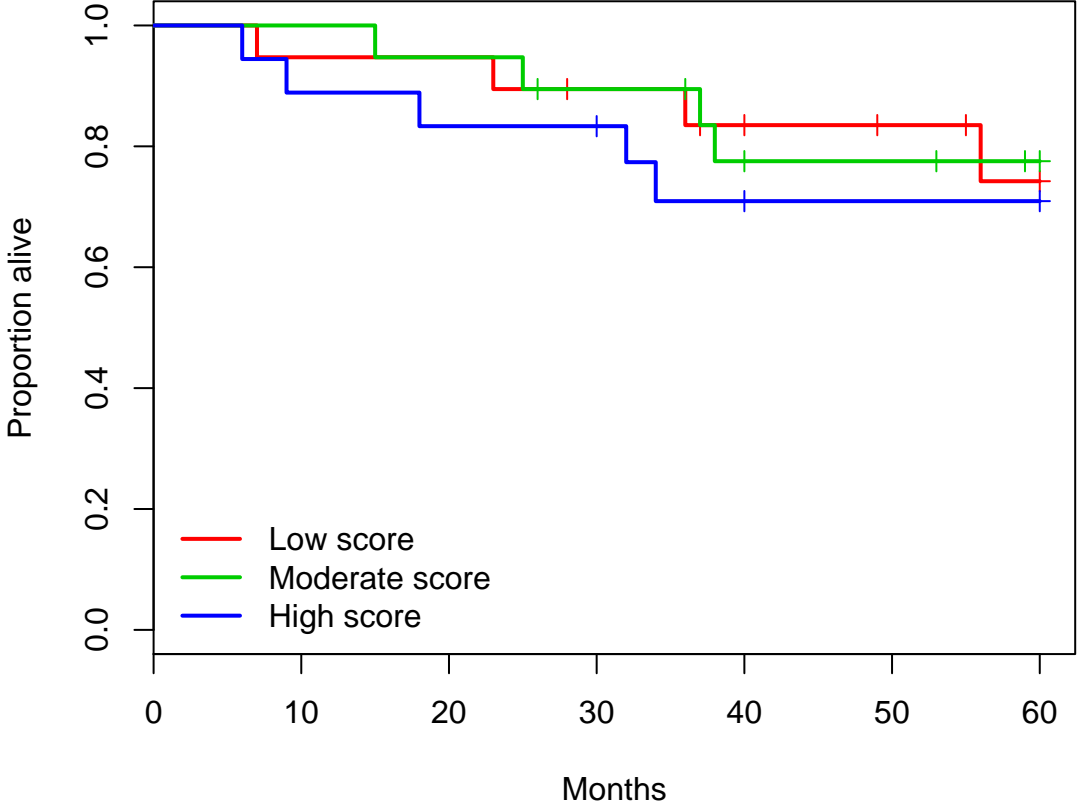



**CAN/DF data  
Method C  
all stages**

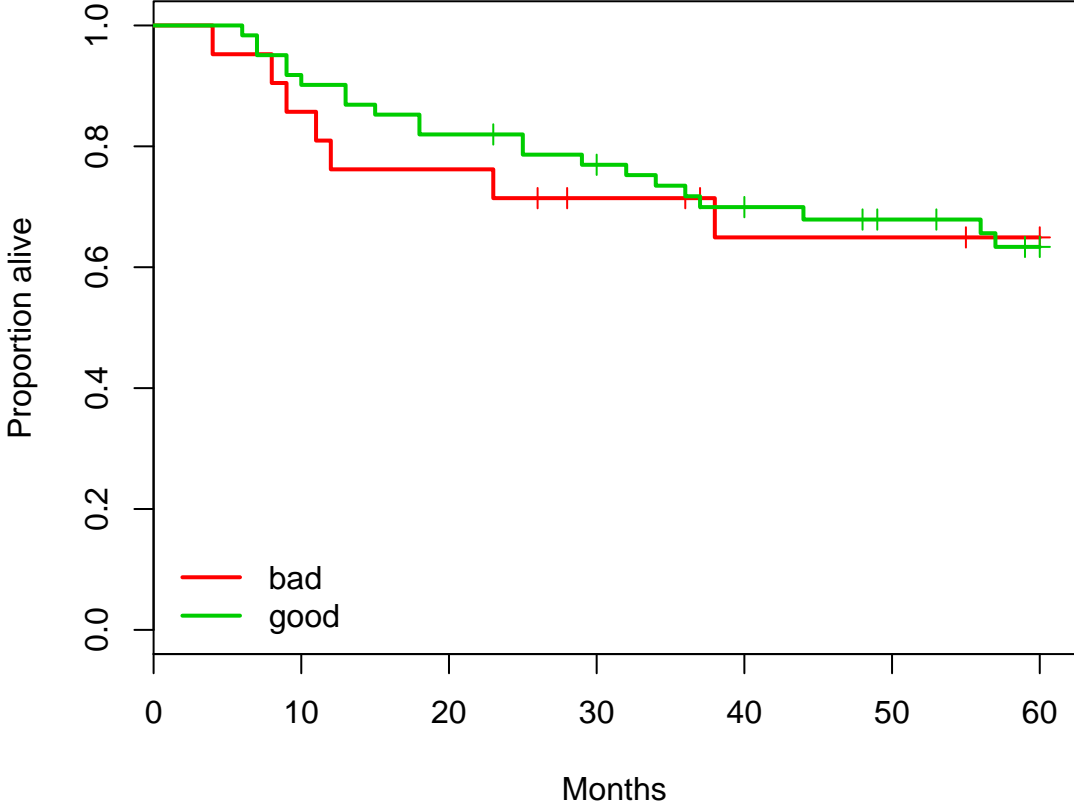

**CAN/DF data  
Method C  
stage 1 only**

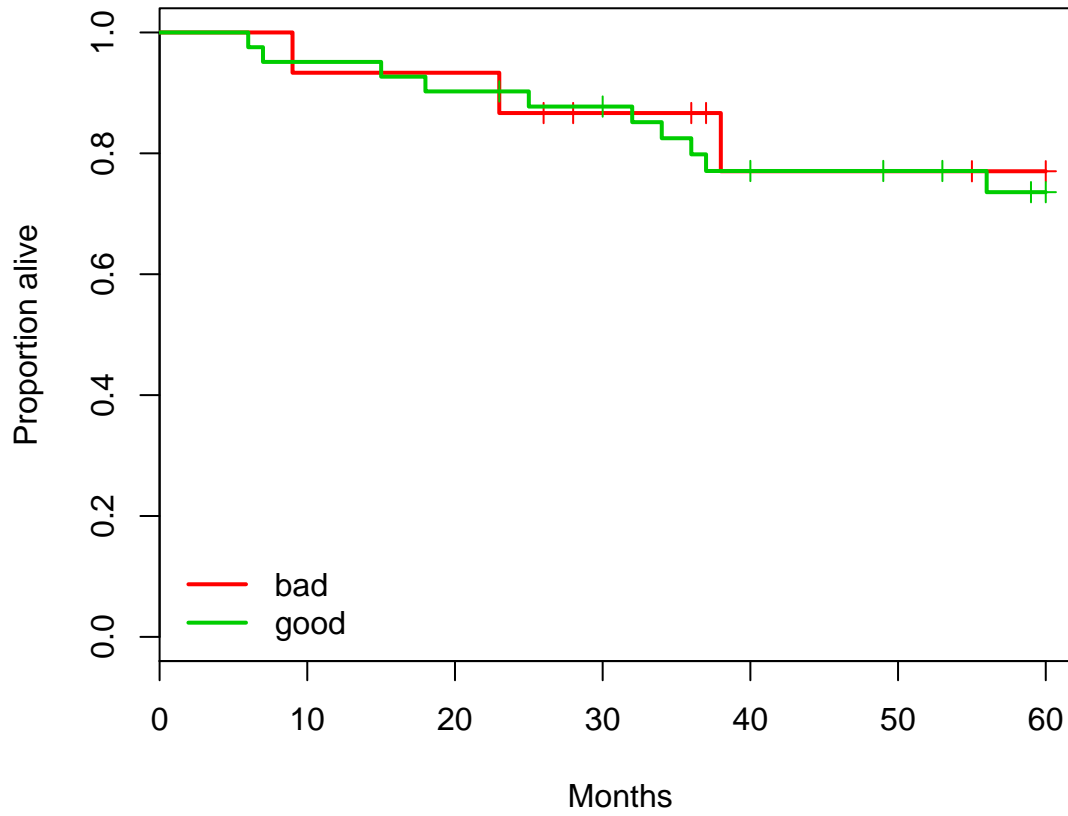

**CAN/DF data  
Method D  
all stages**

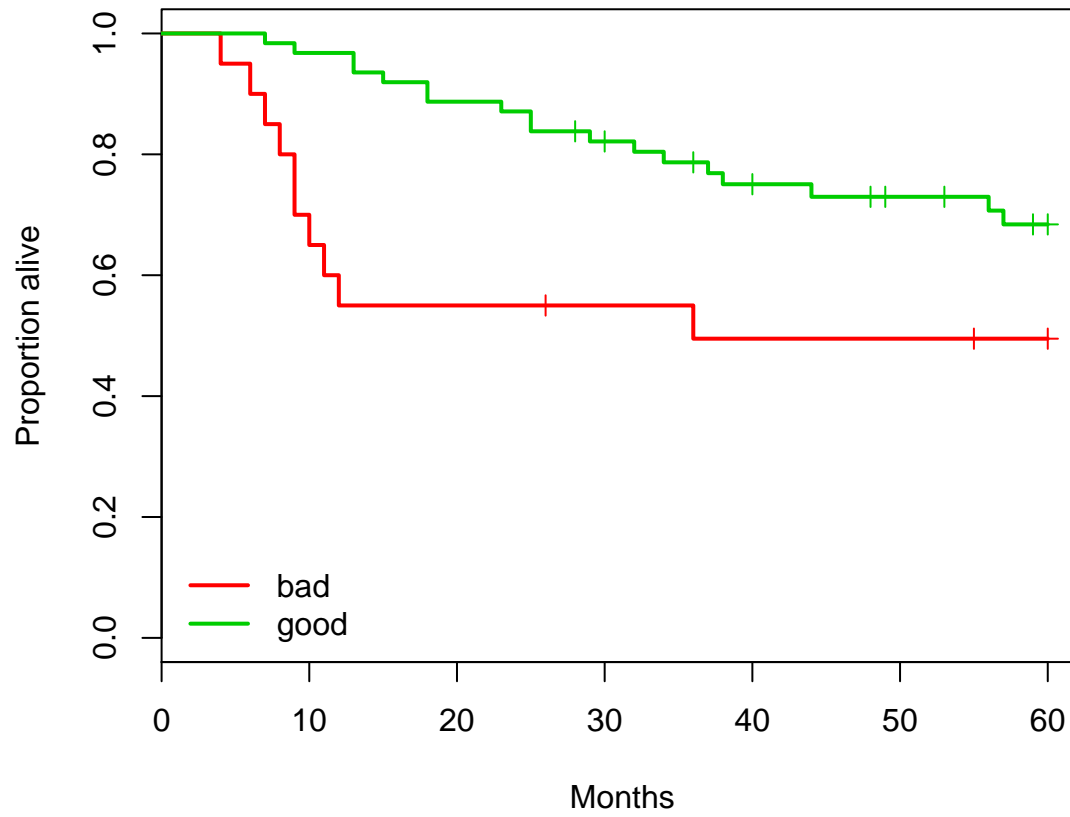

**CAN/DF data  
Method D  
stage 1 only**

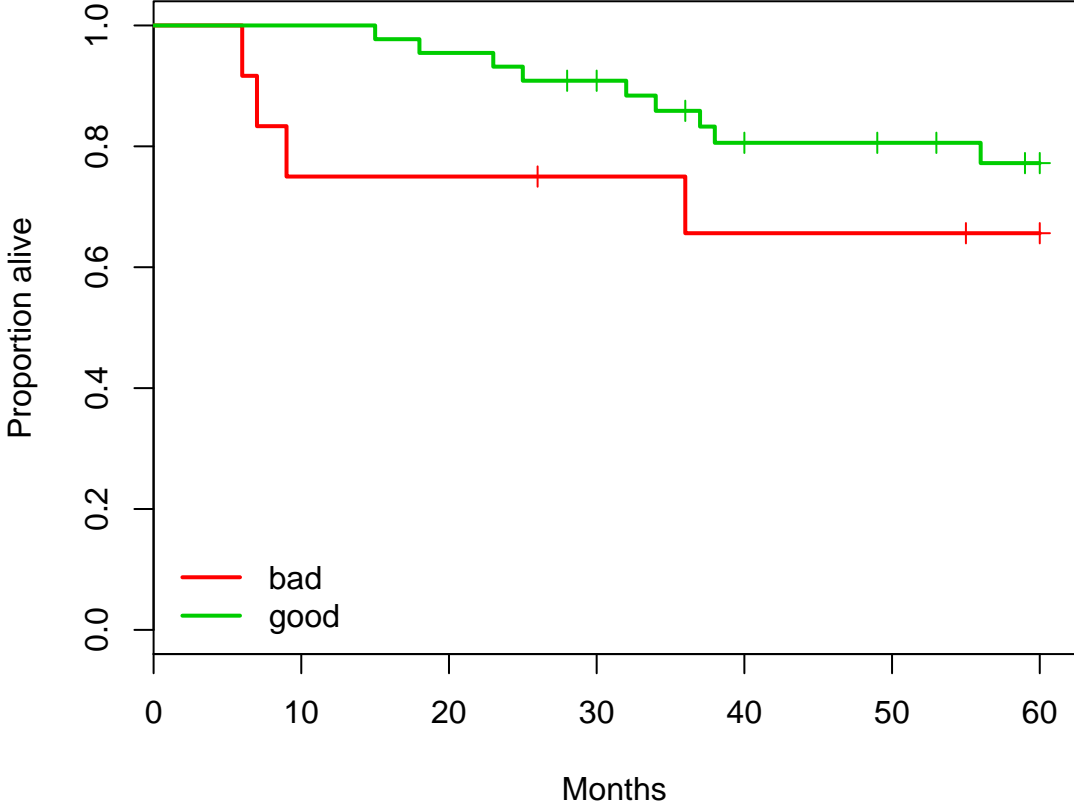

**CAN/DF data**  
**Method E**  
**all stages**

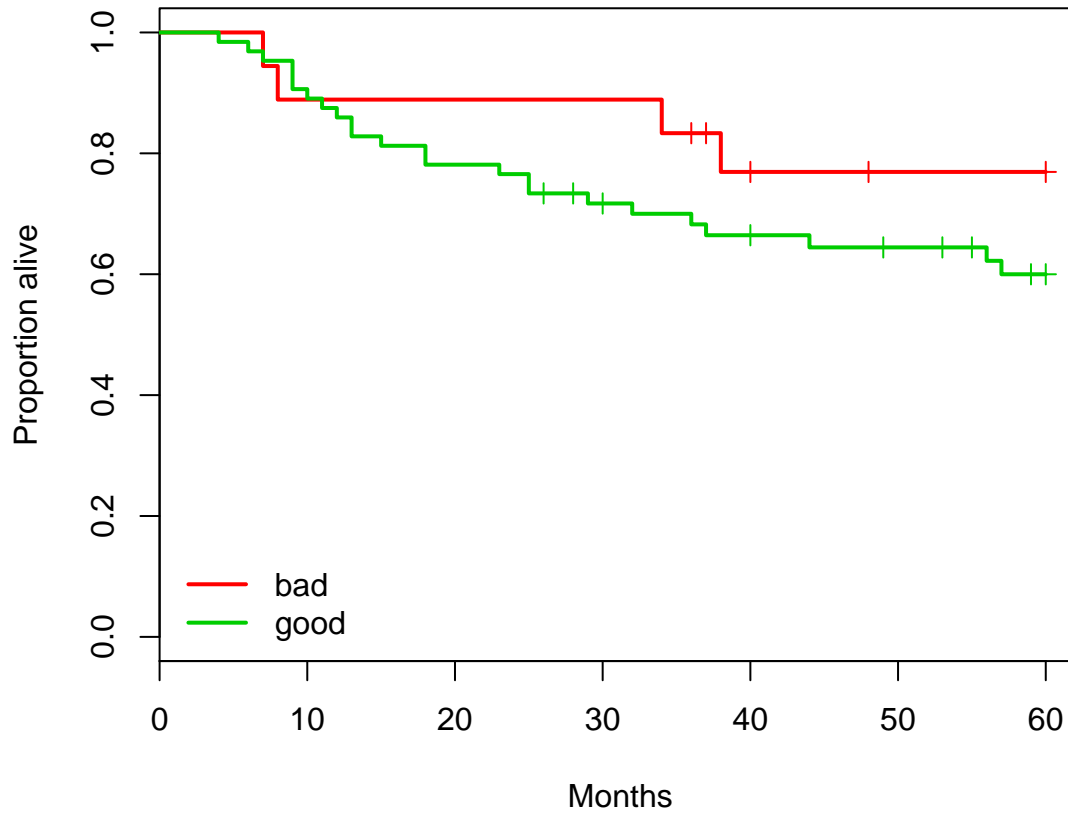

**CAN/DF data  
Method E  
stage 1 only**

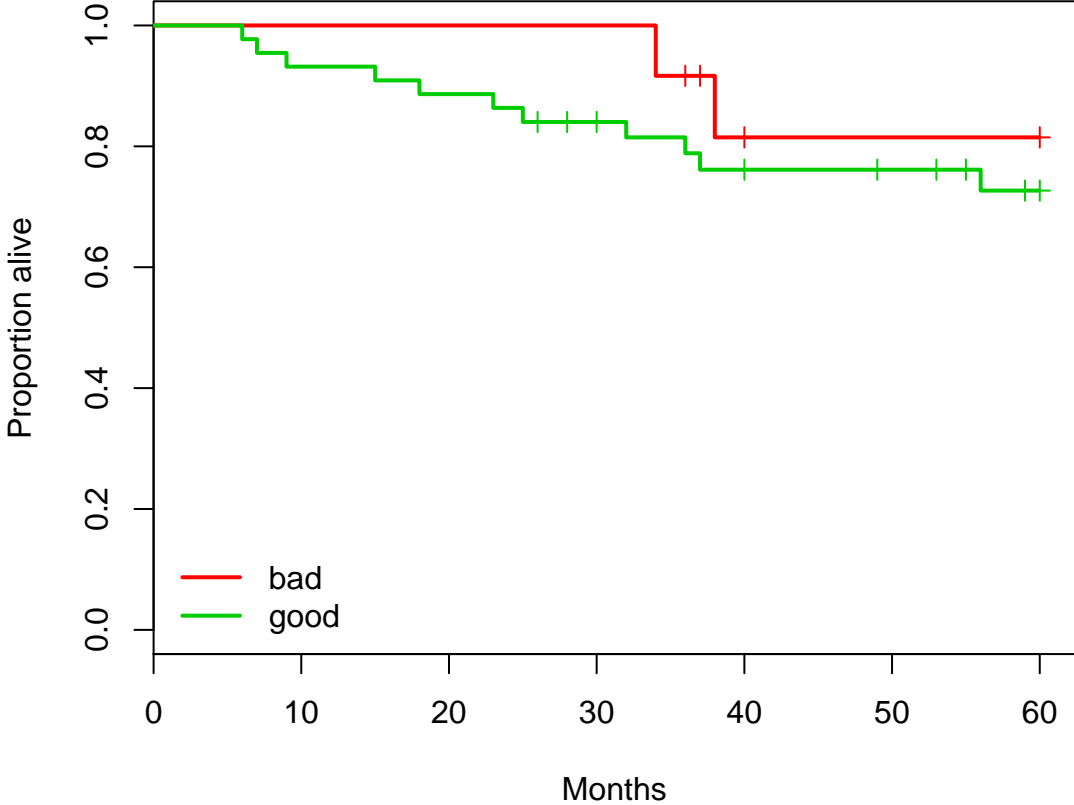

**CAN/DF data  
Method F  
all stages**

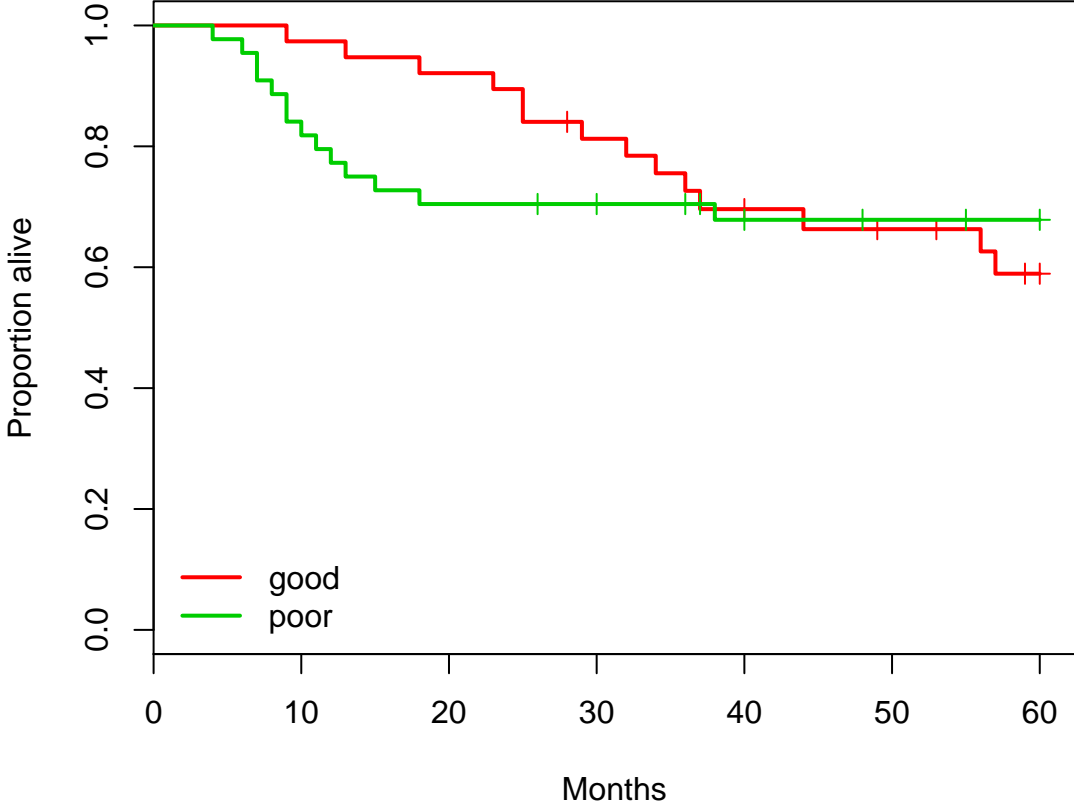

**CAN/DF data  
Method F  
stage 1 only**

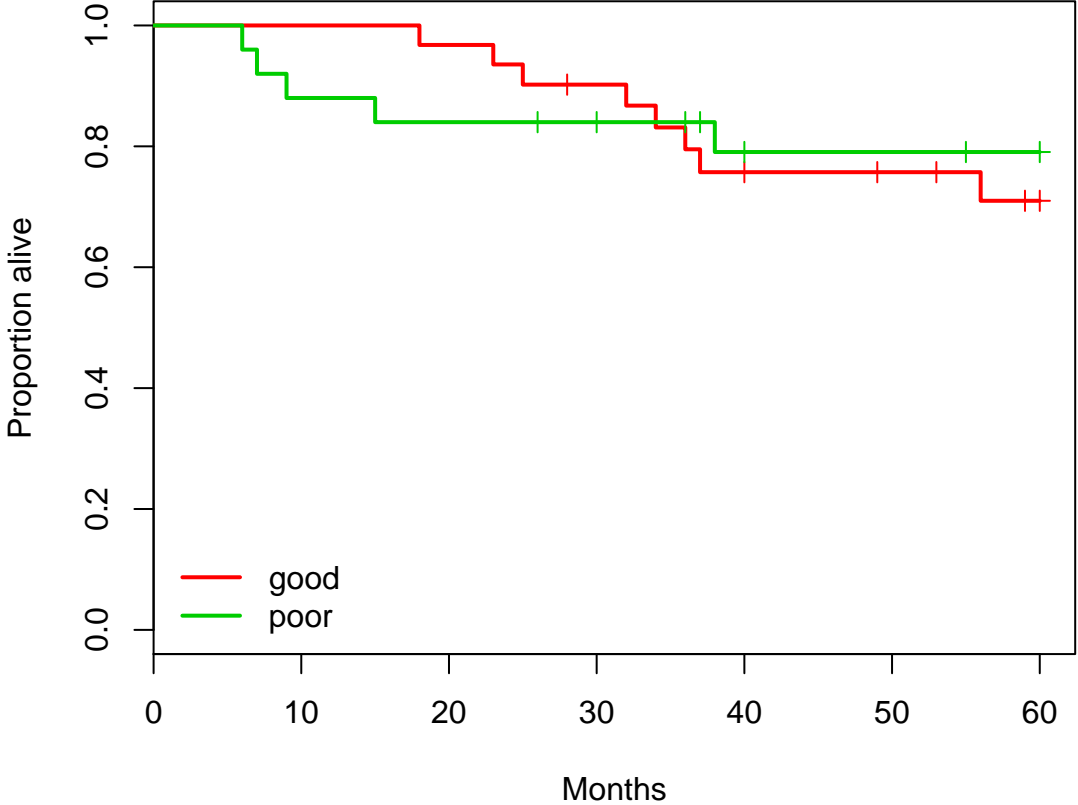



**CAN/DF data**  
**Method G**  
**all stages**

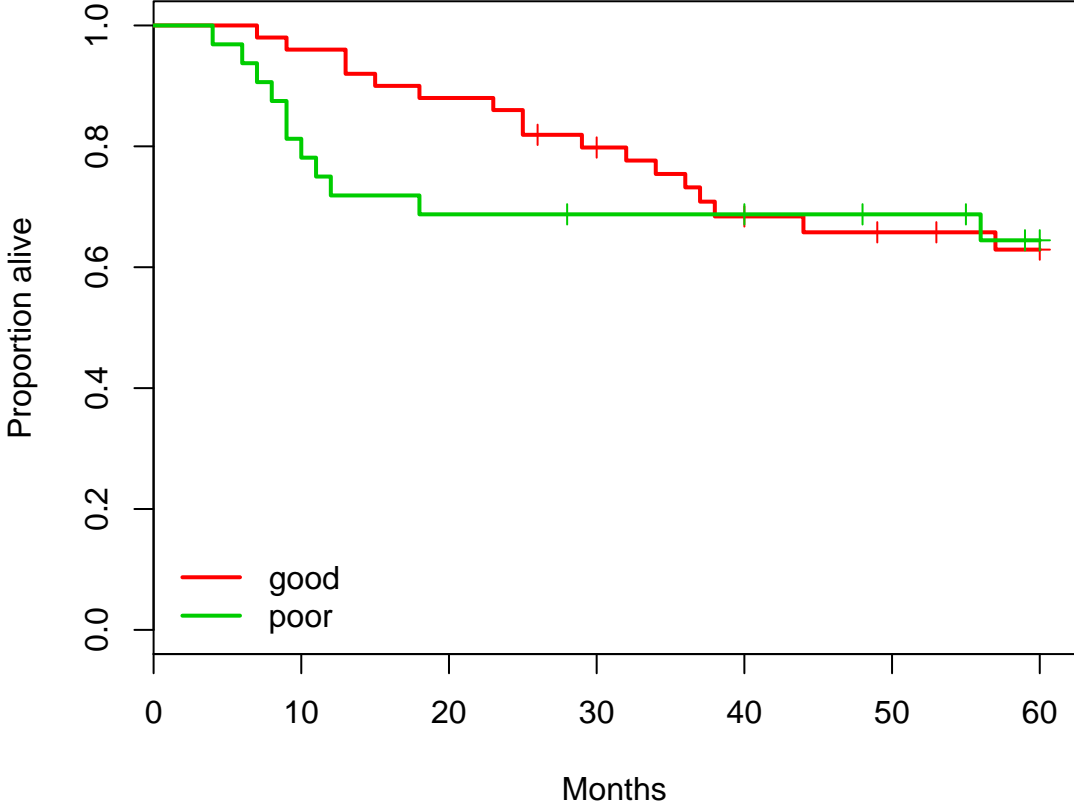

**CAN/DF data  
Method G  
stage 1 only**

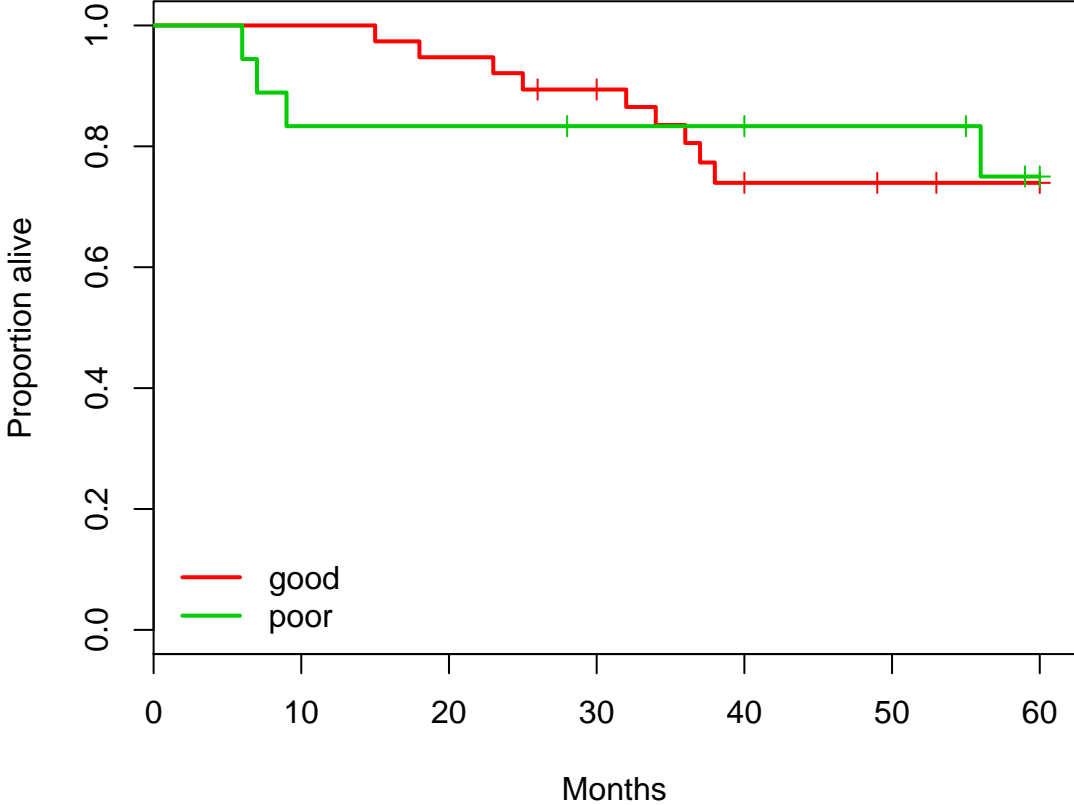

**CAN/DF data  
Method H  
all stages**

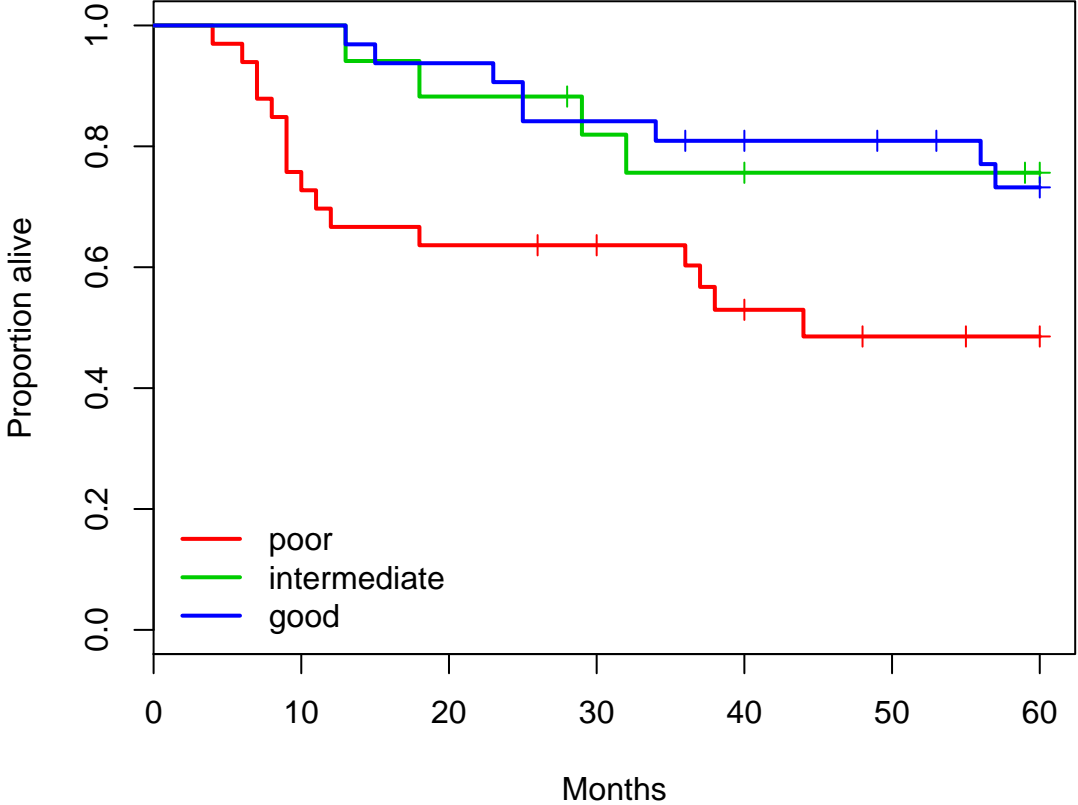

**CAN/DF data  
Method H  
stage 1 only**

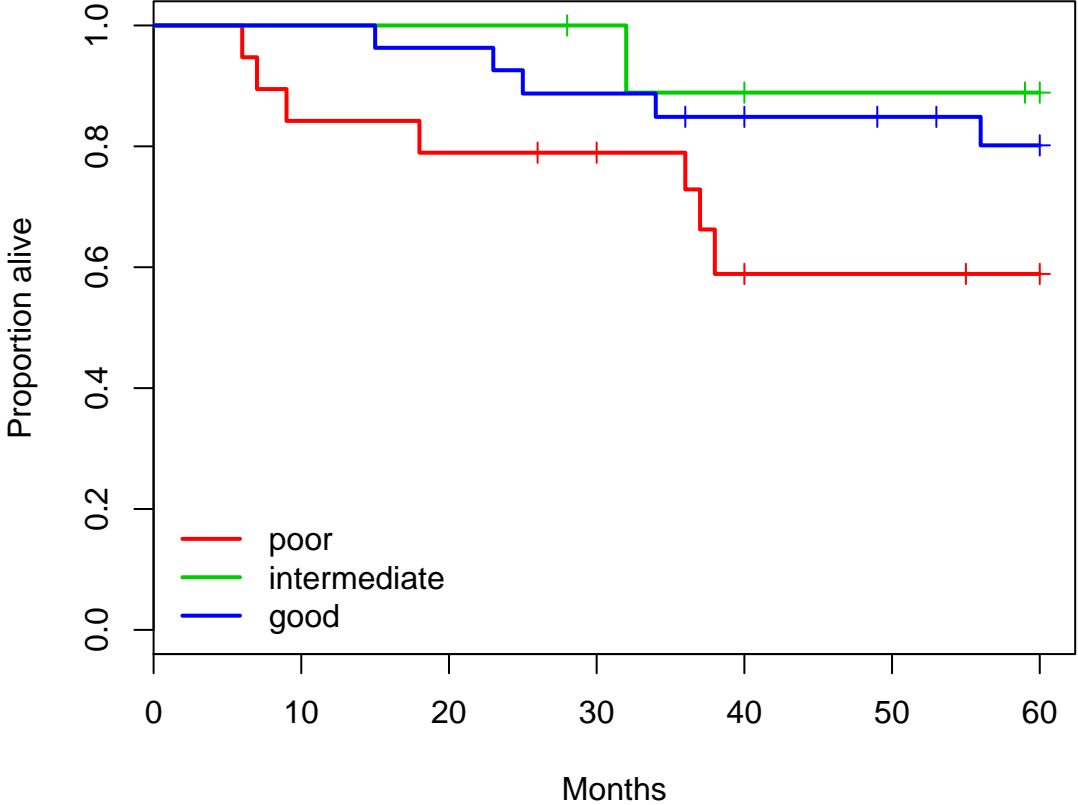

Supplement: NIHMS96850-supplement-SUP_3.pdf [file NIHMS96850-supplement-SUP_3.pdf]
