# Supplementary material
Source: PubMed Central journal article supplement (PMC2667337)

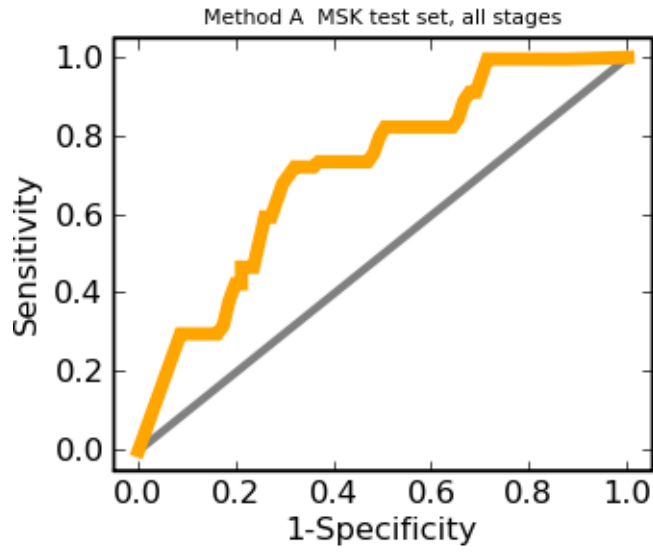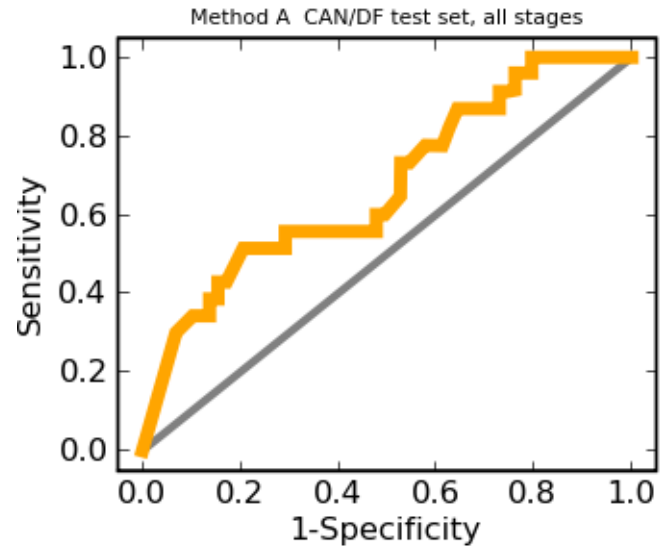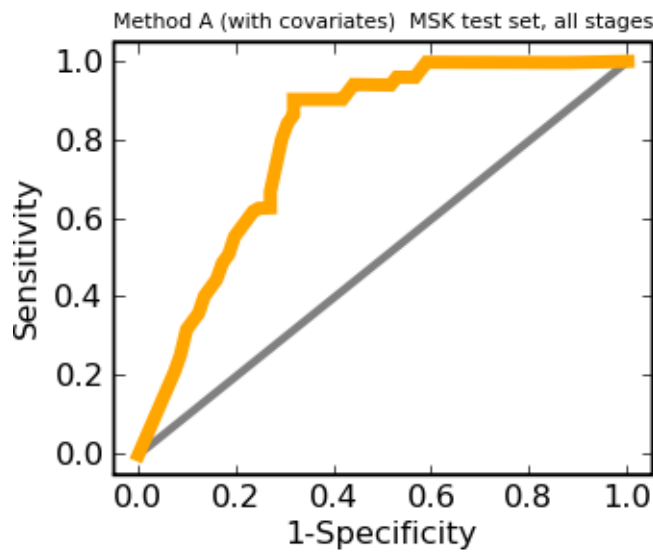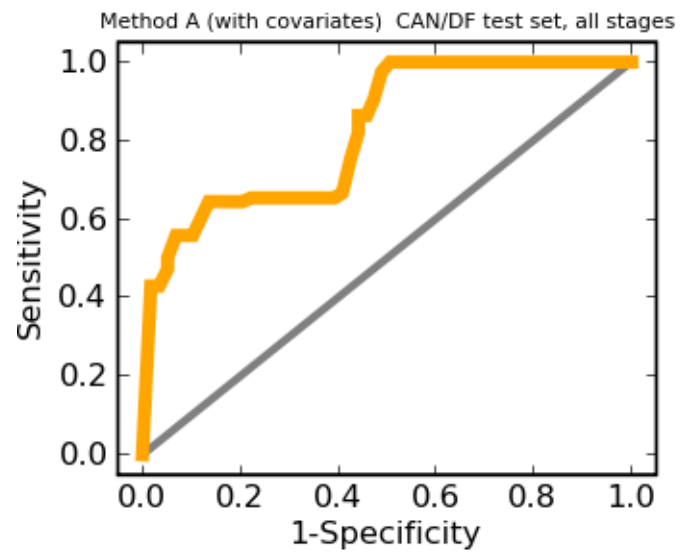

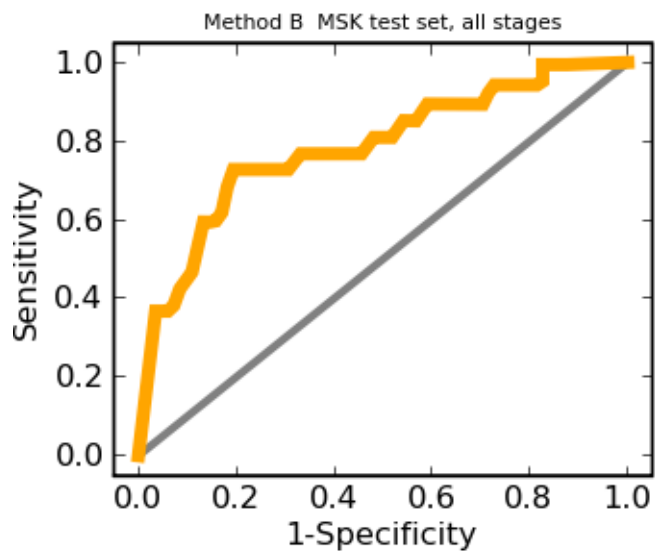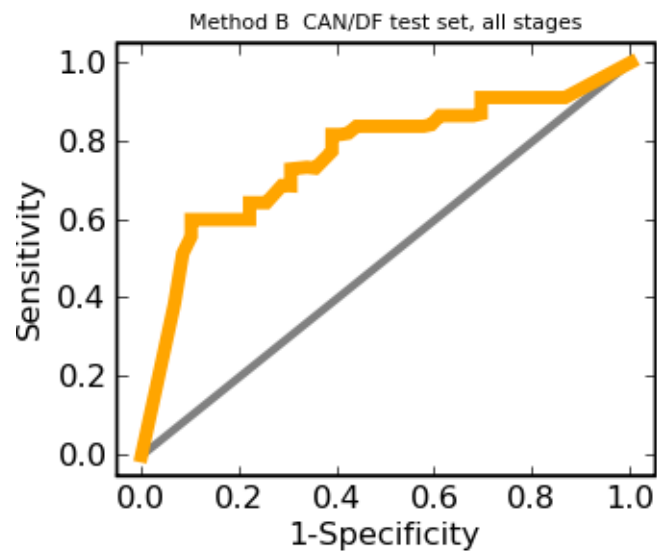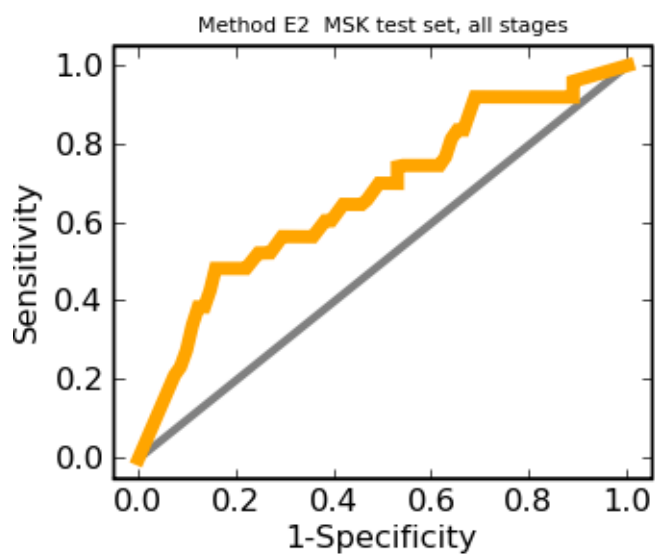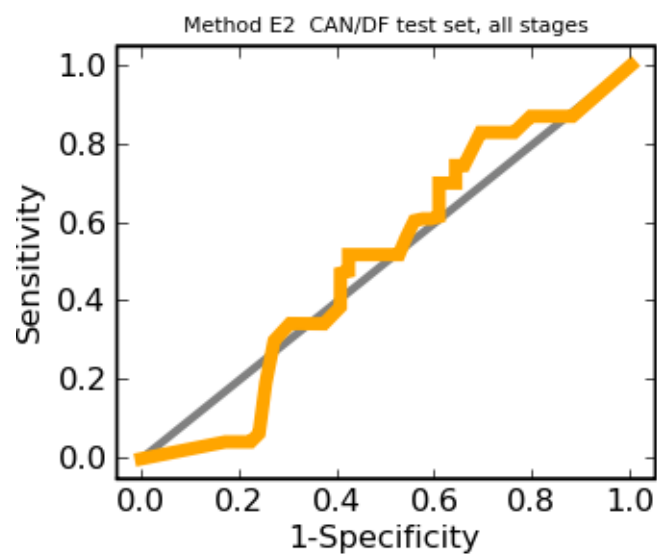

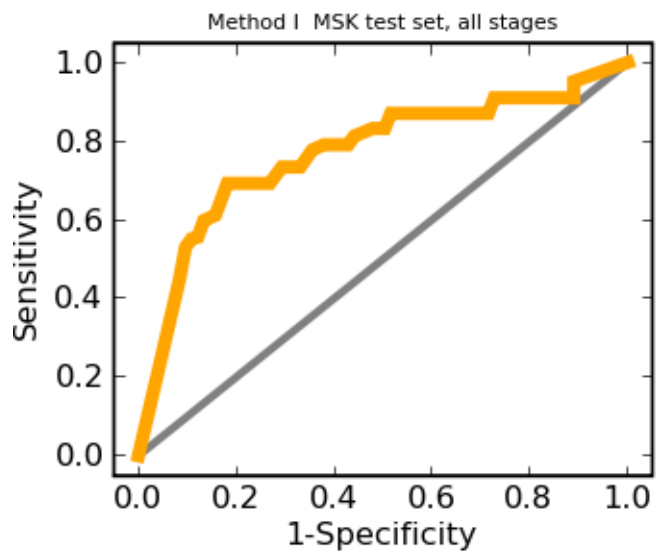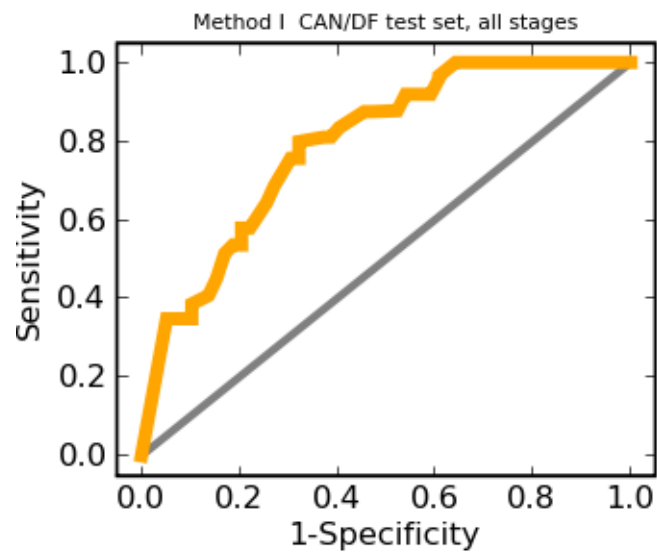

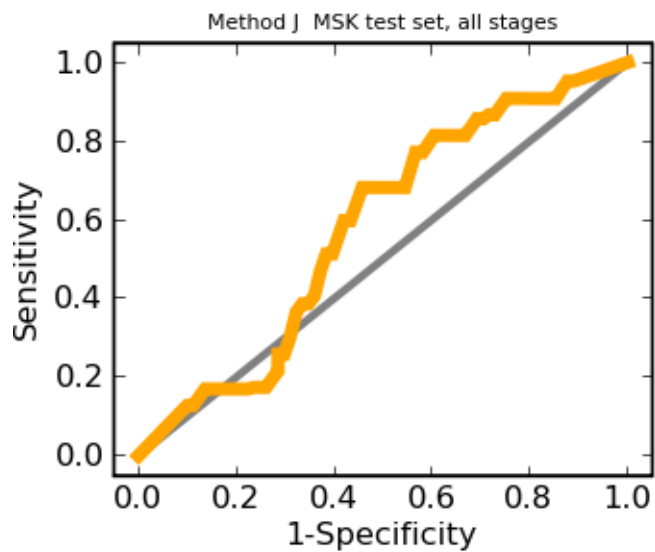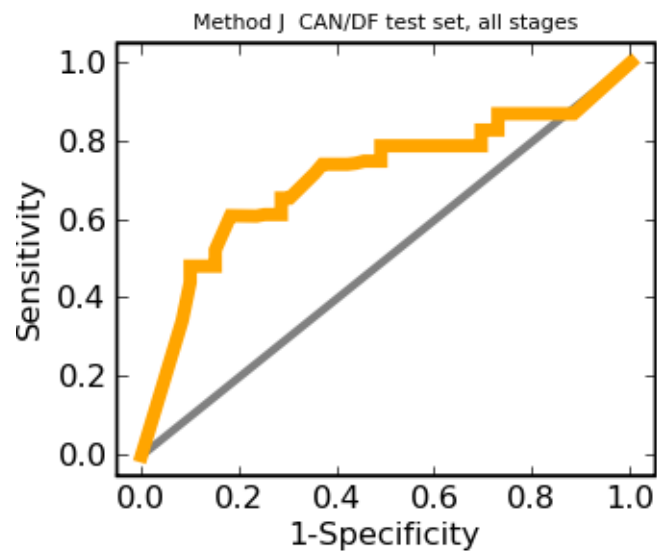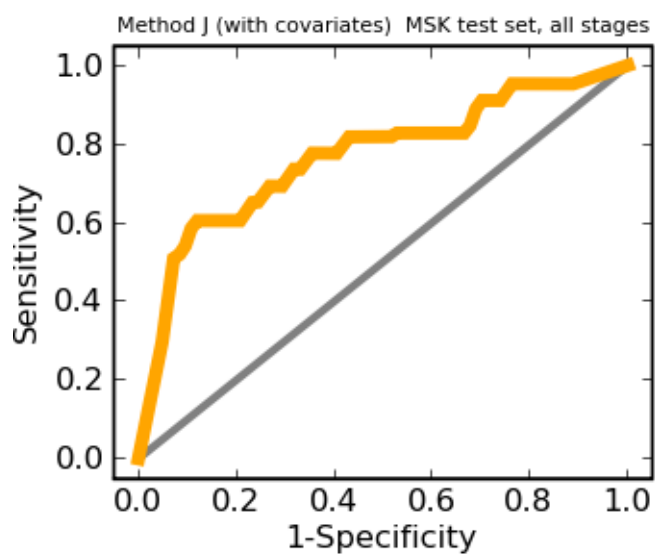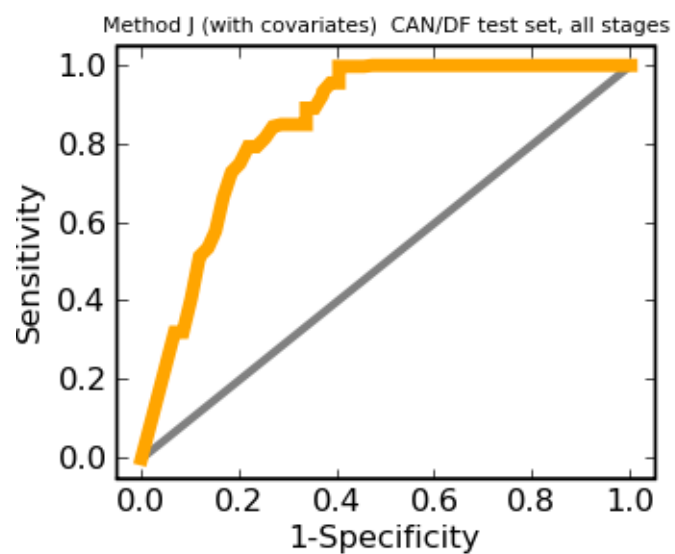

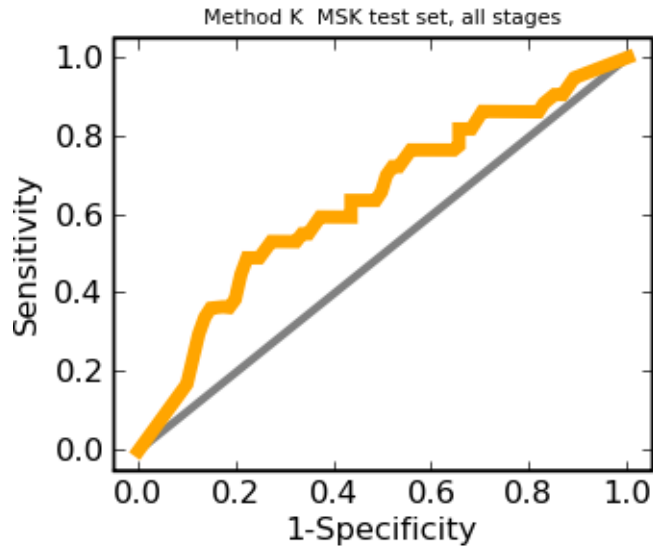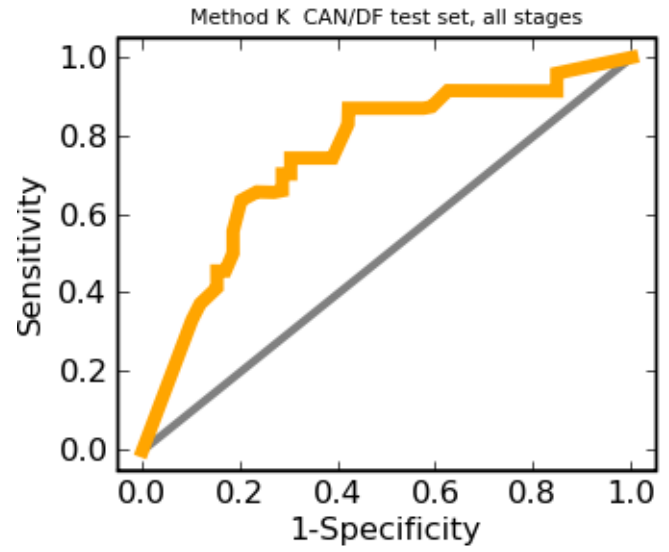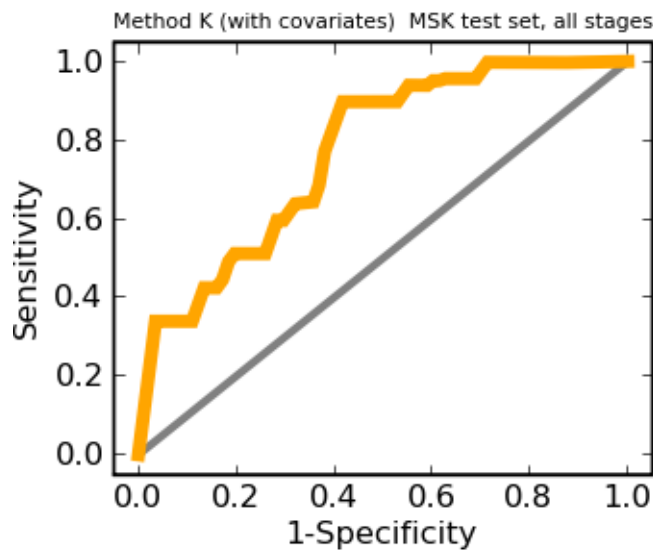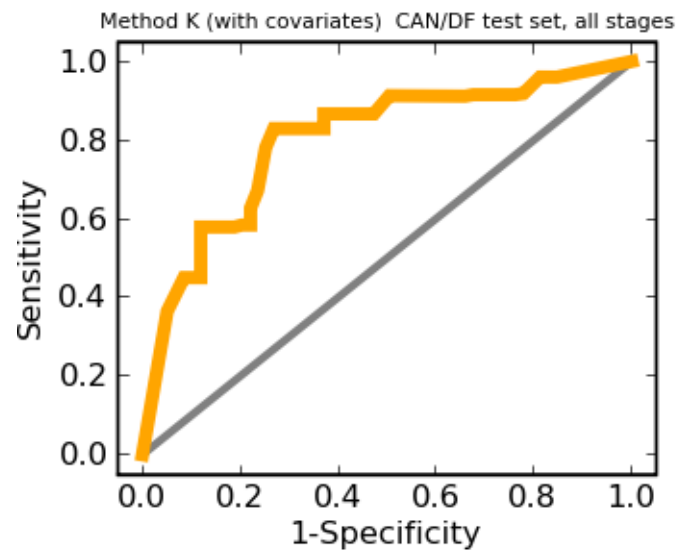

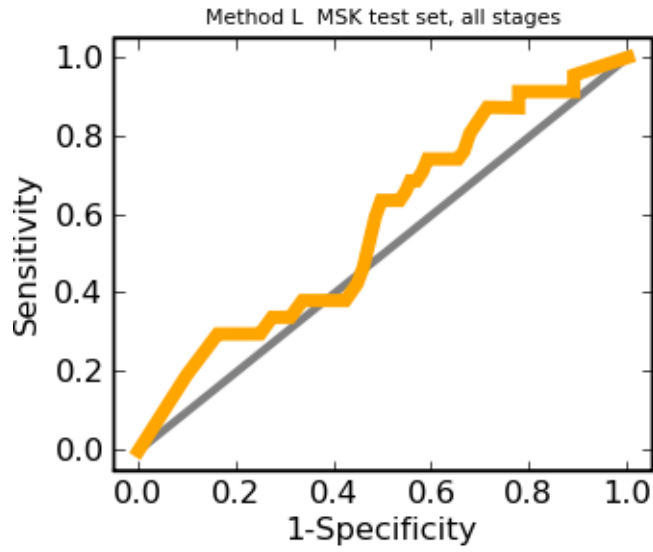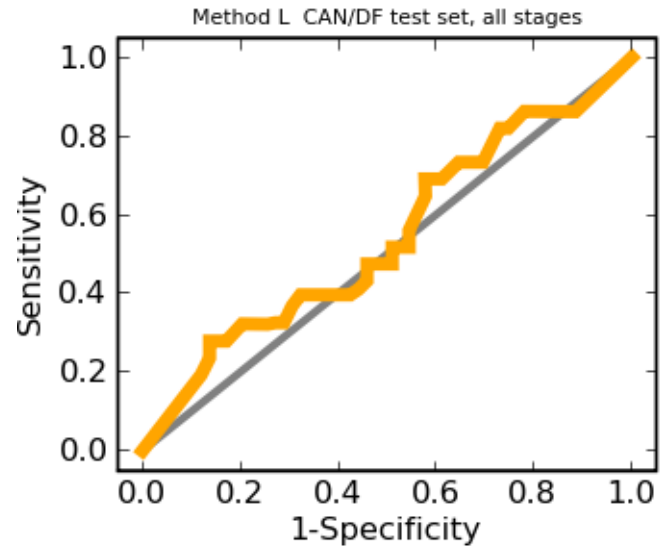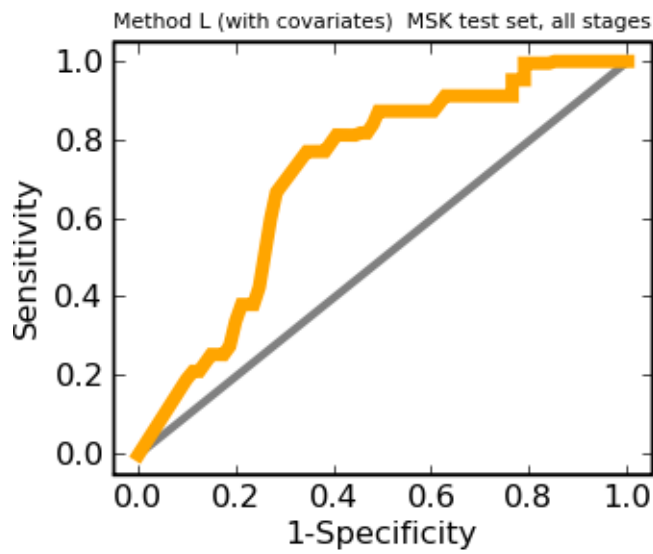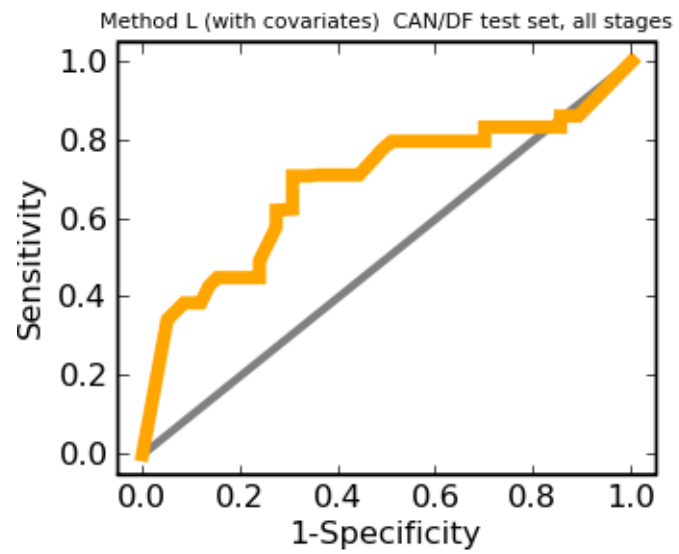

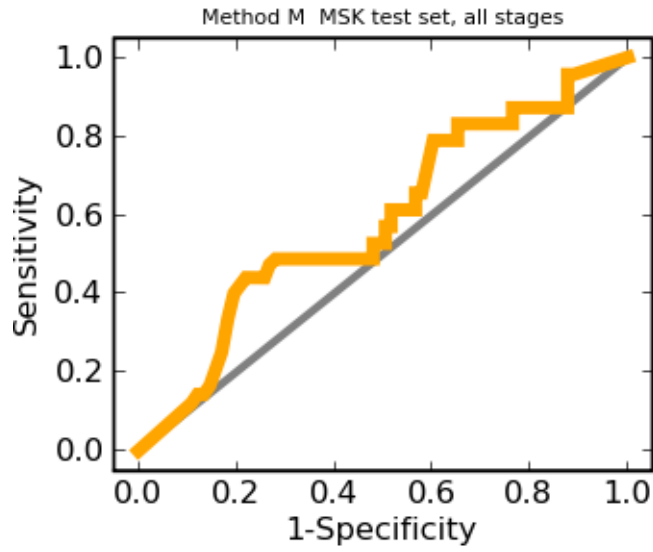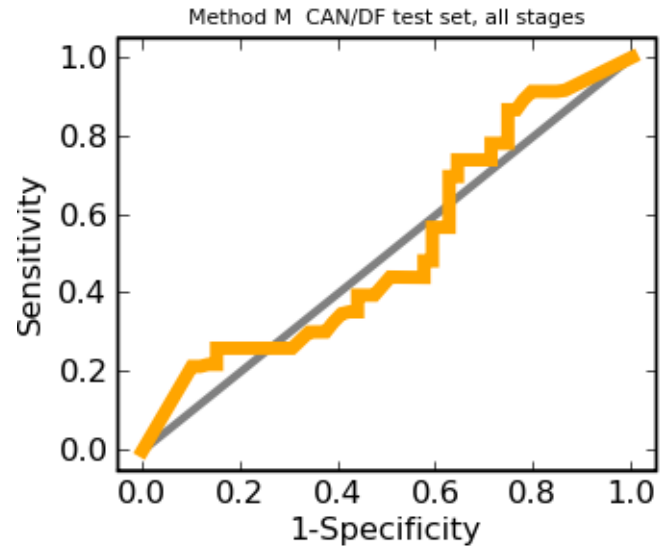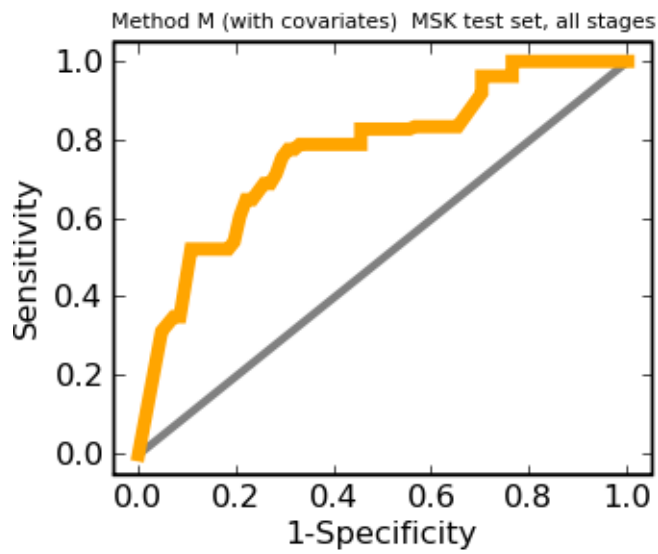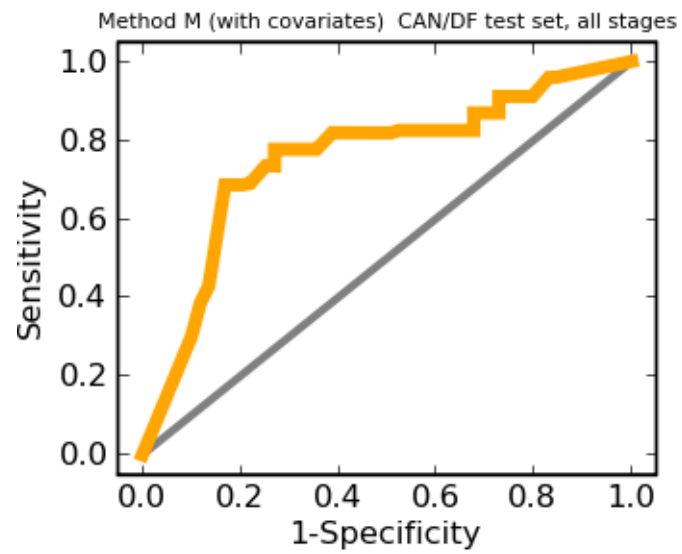

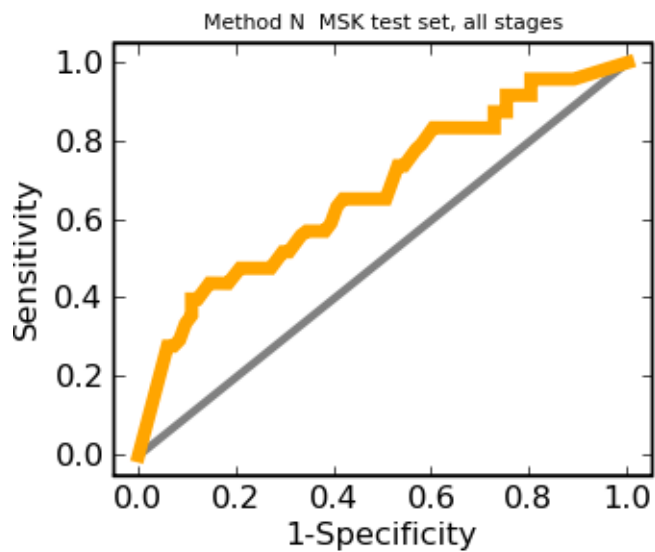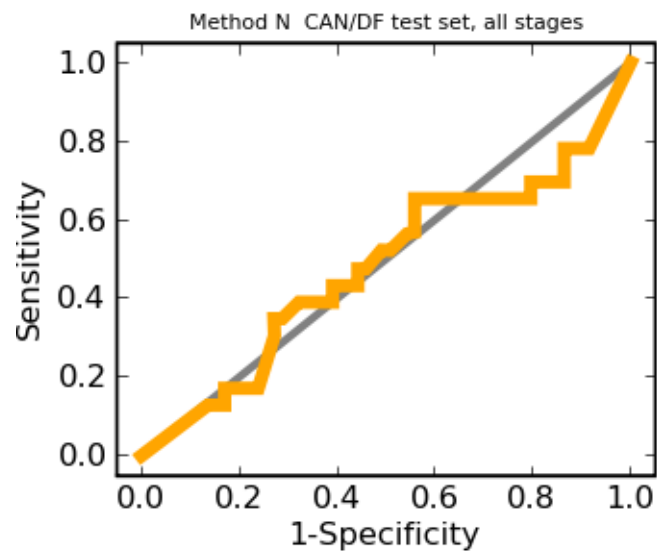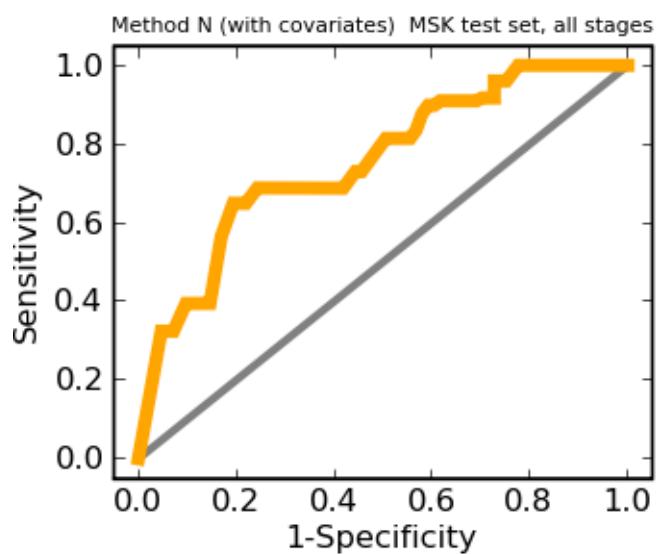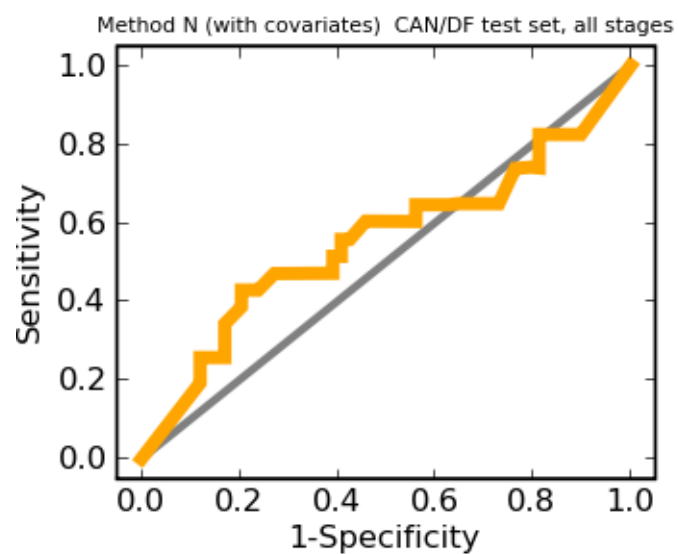



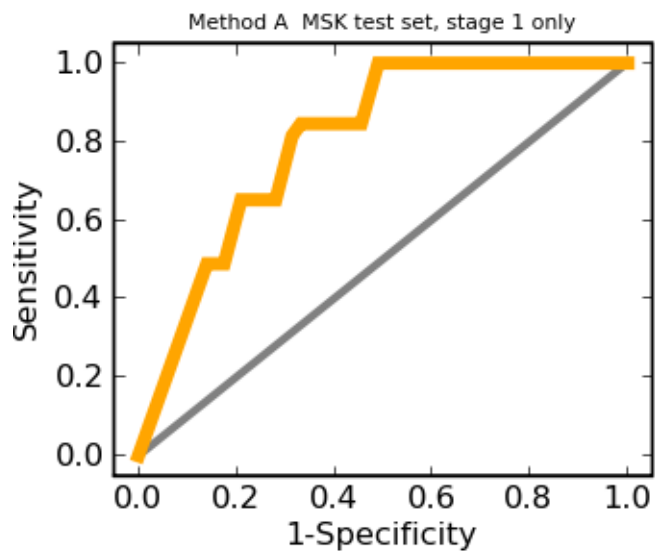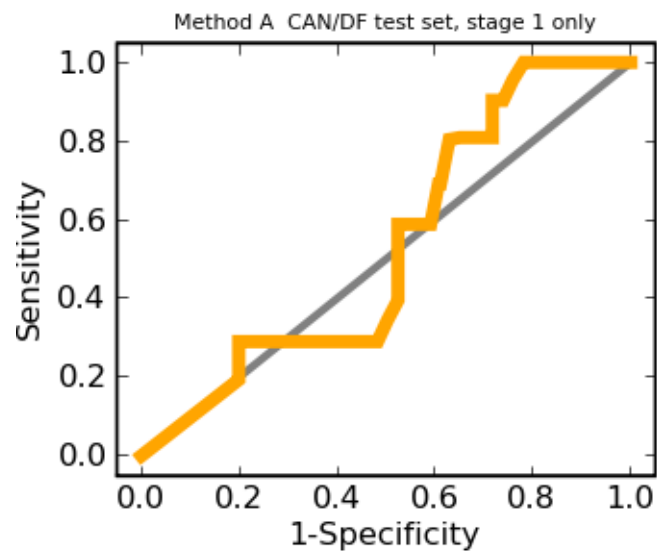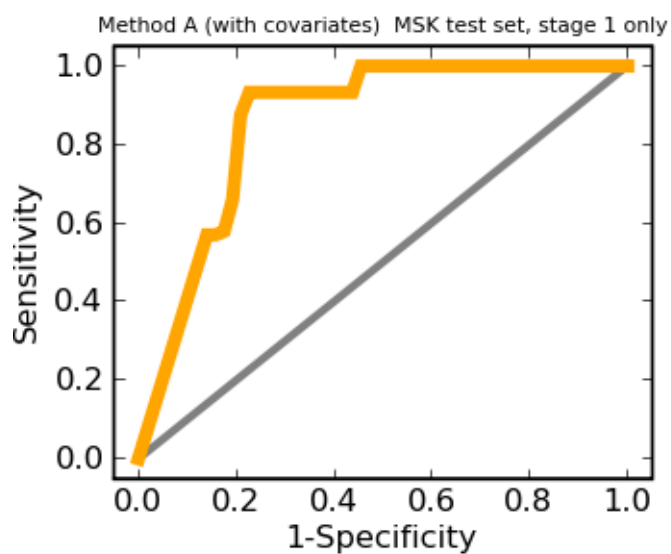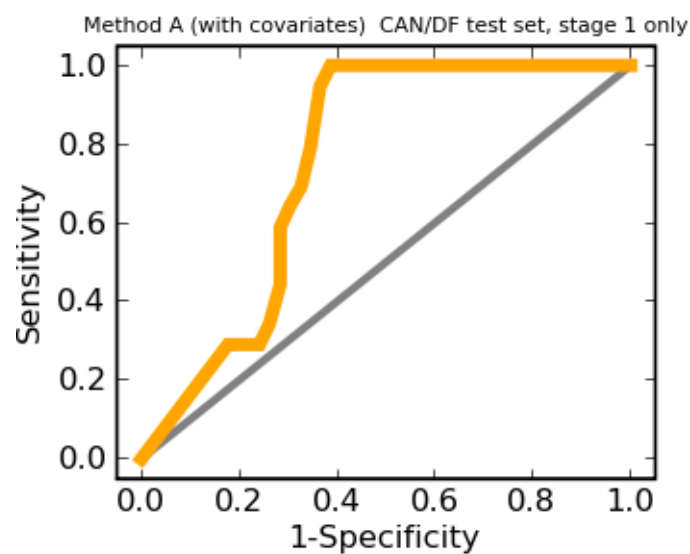

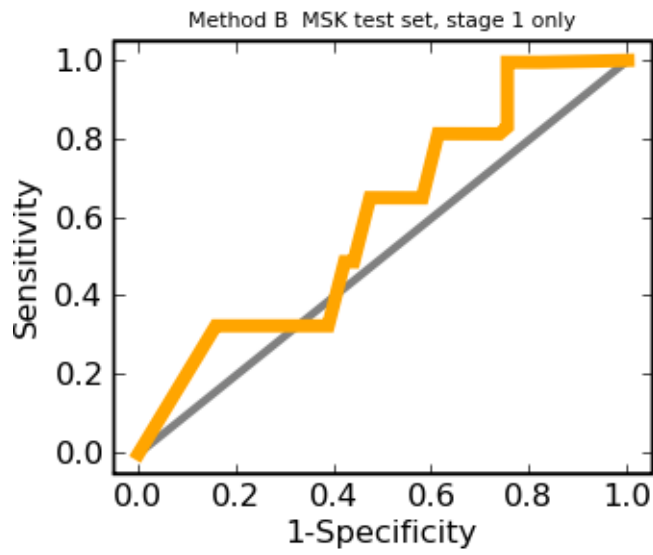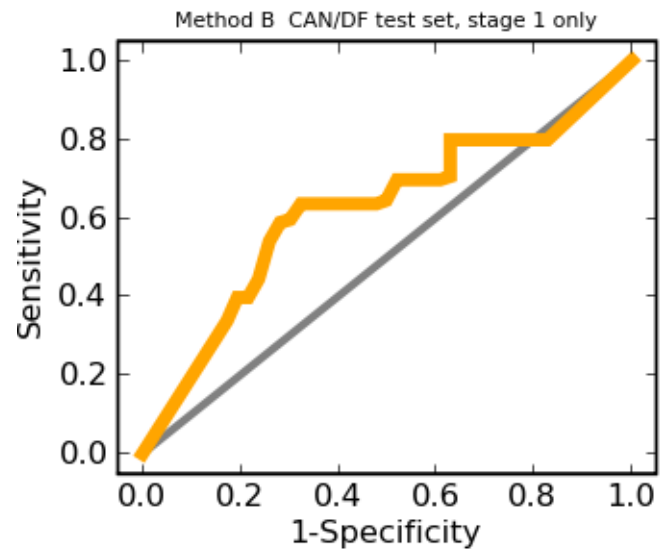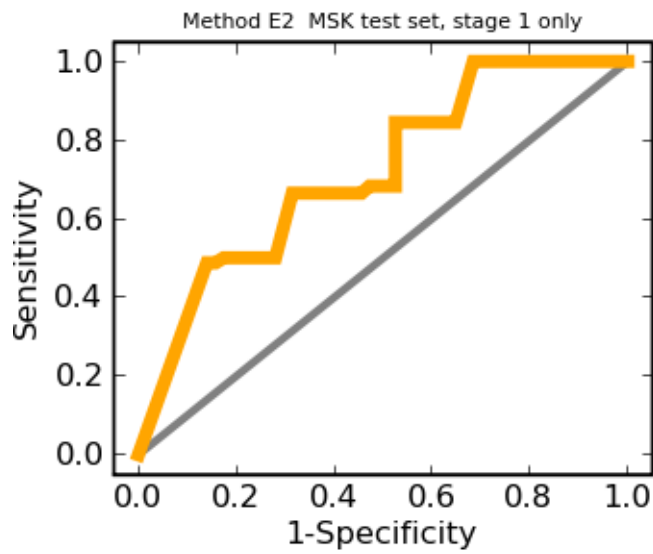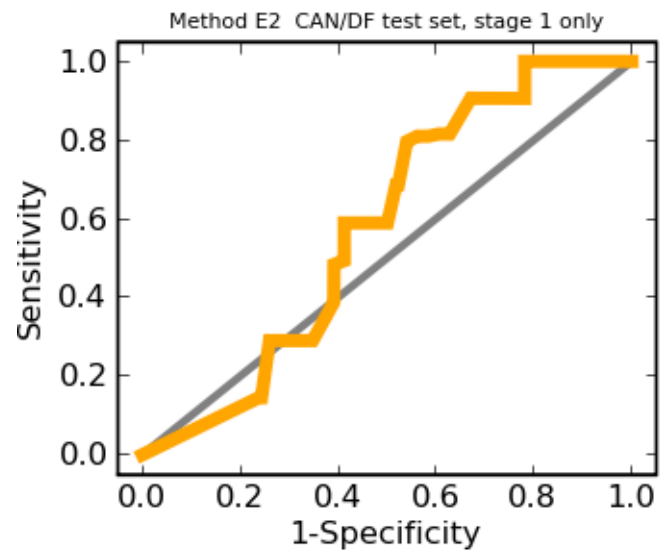

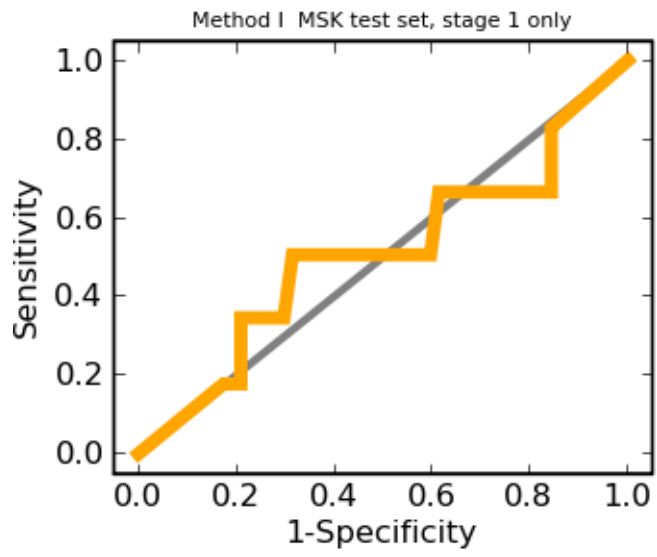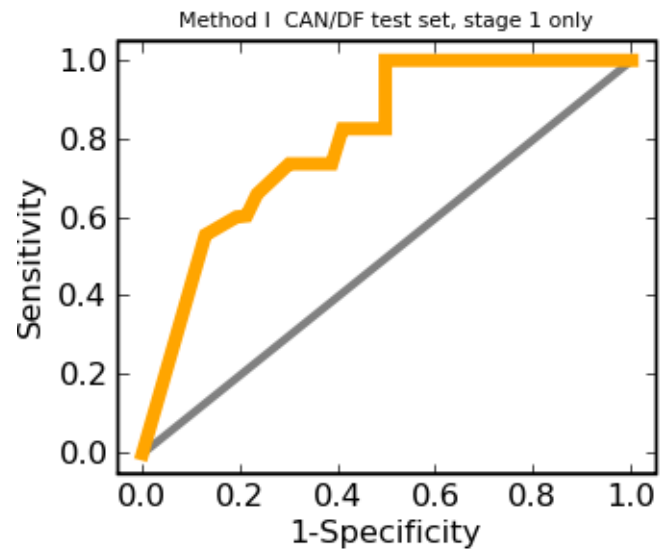

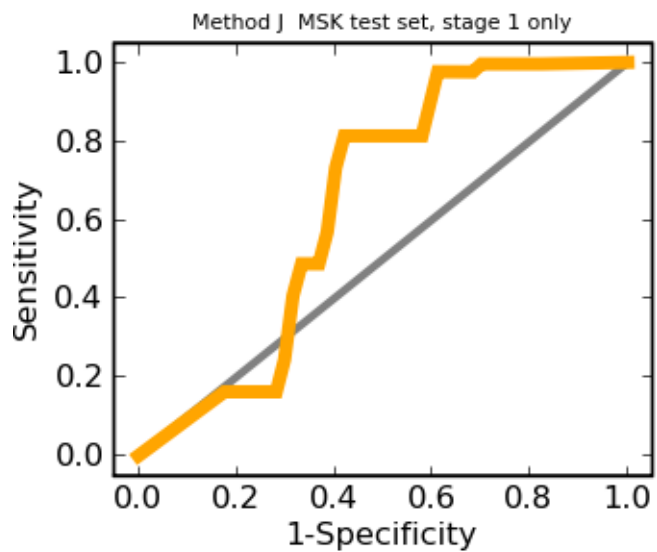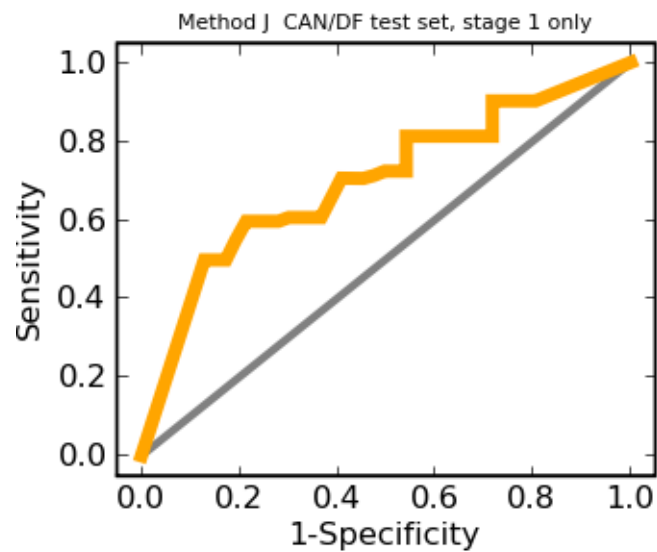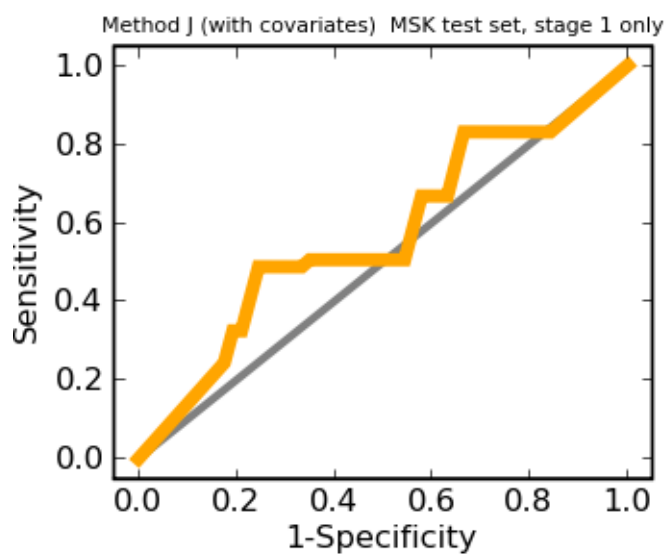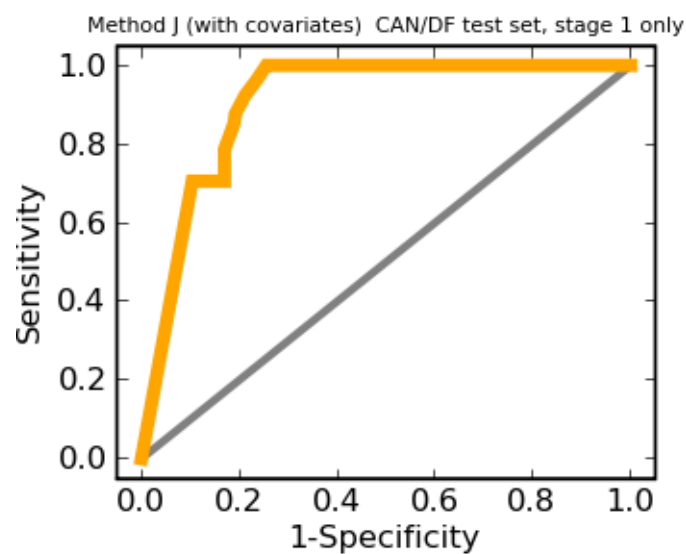

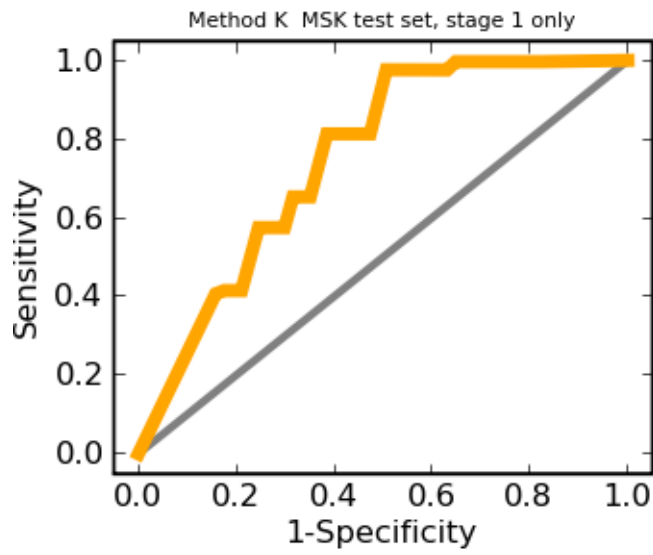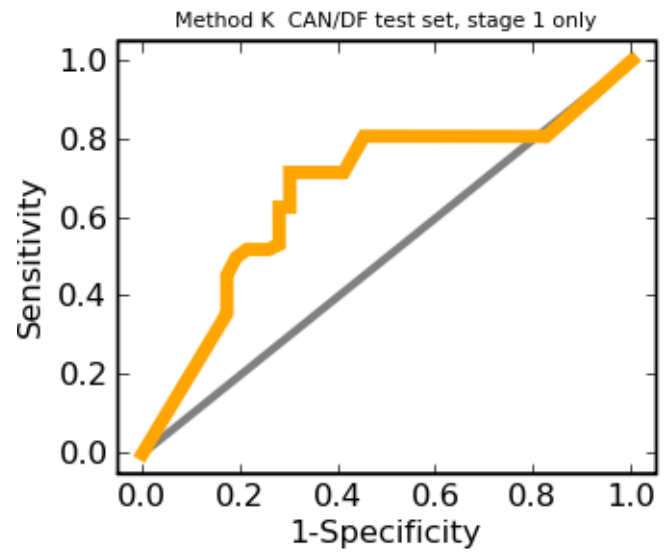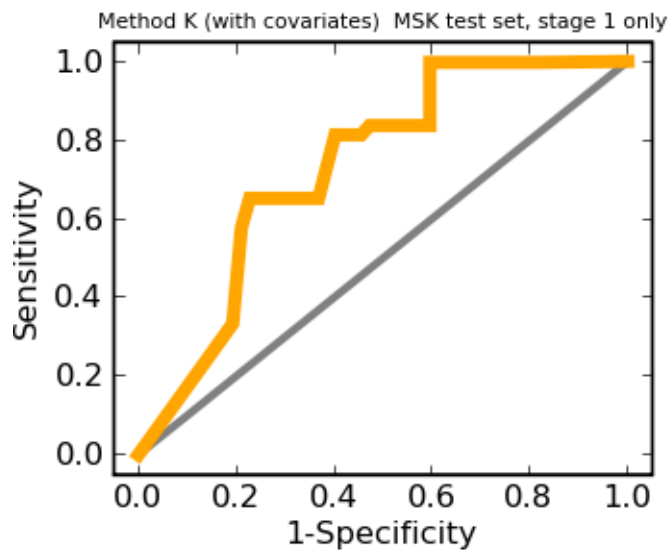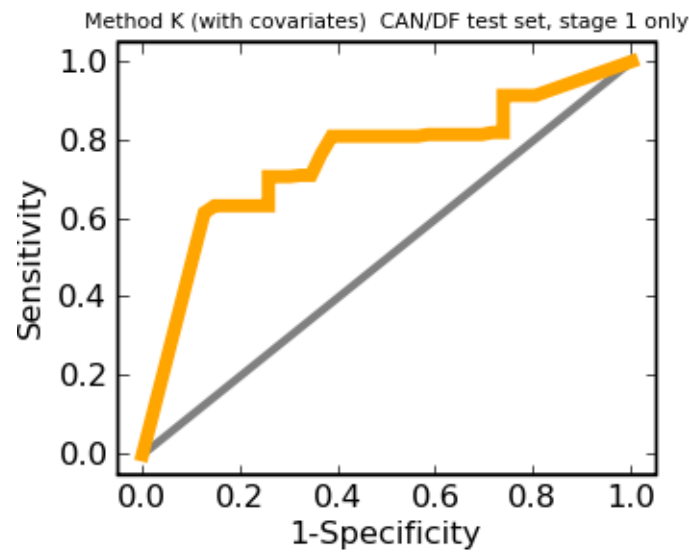

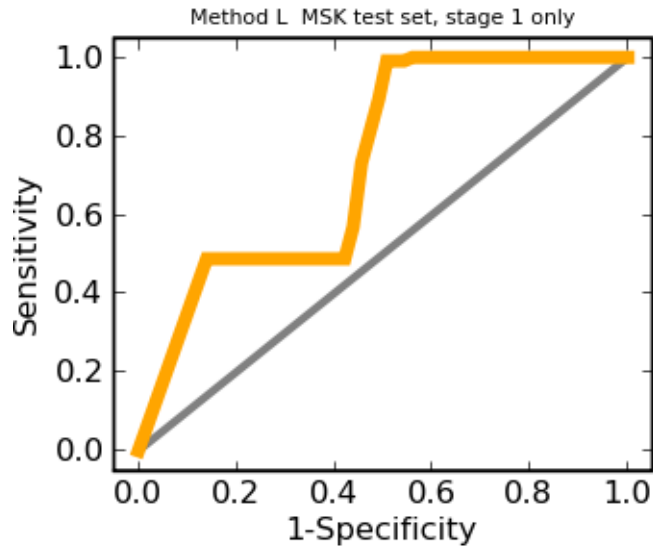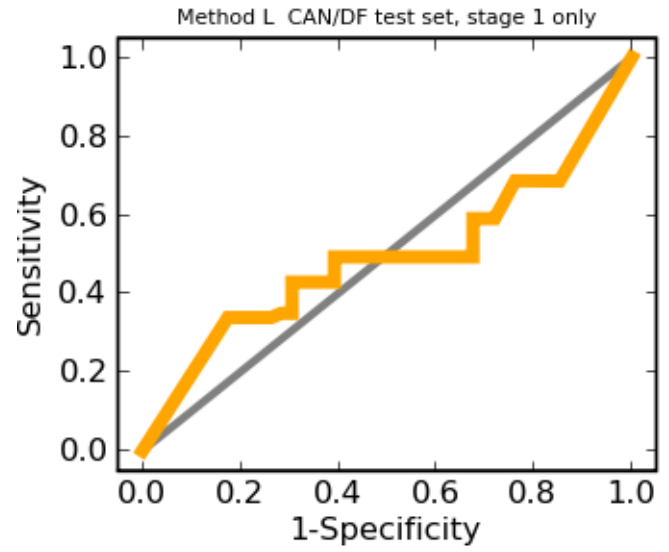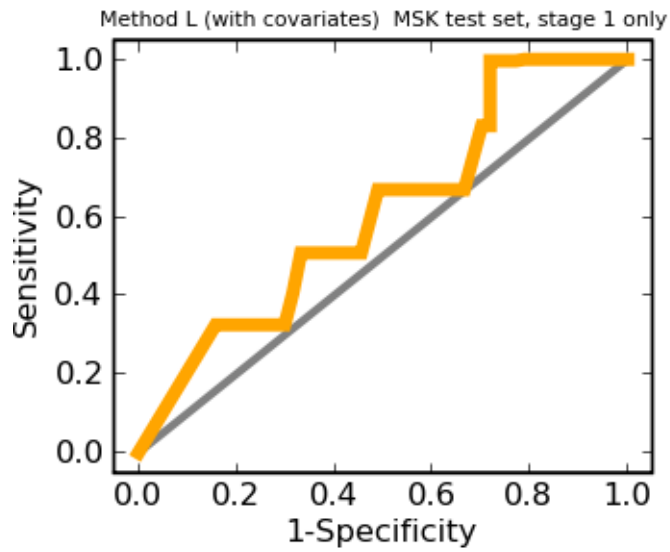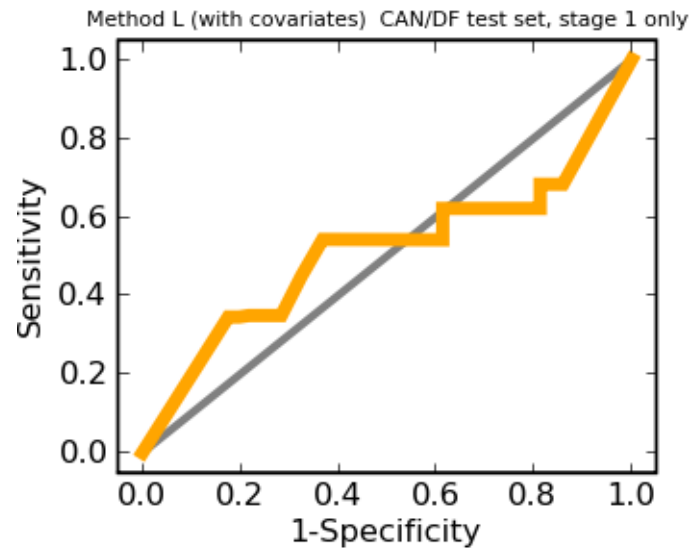

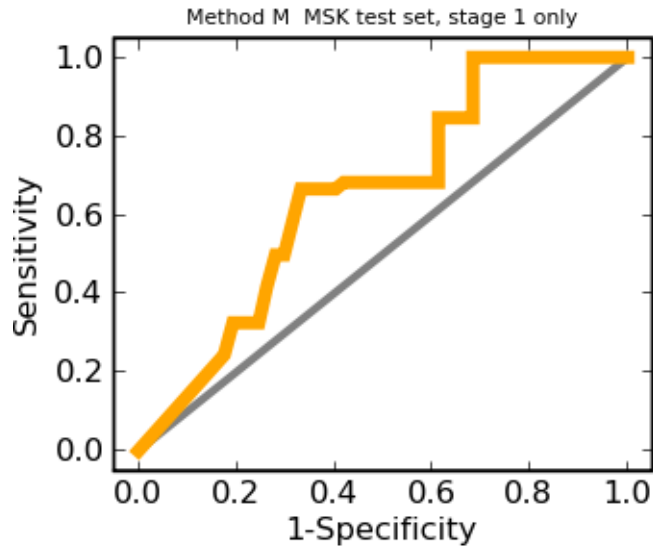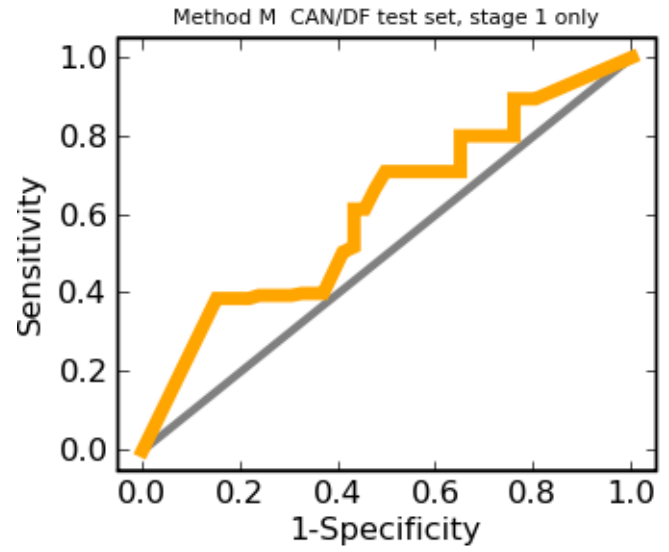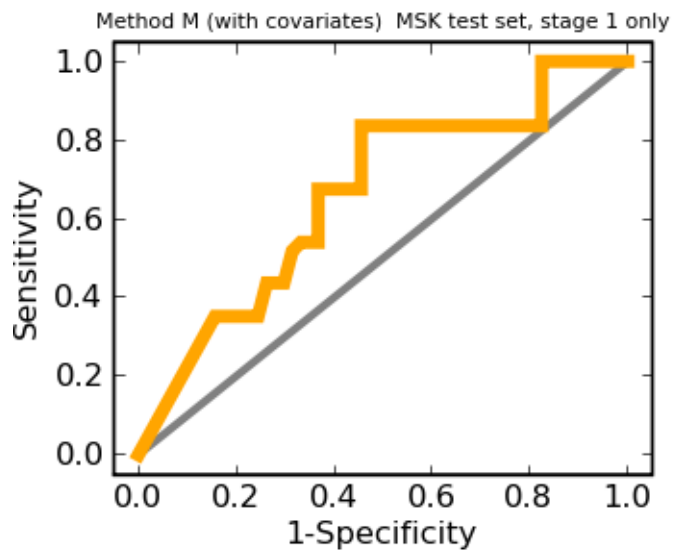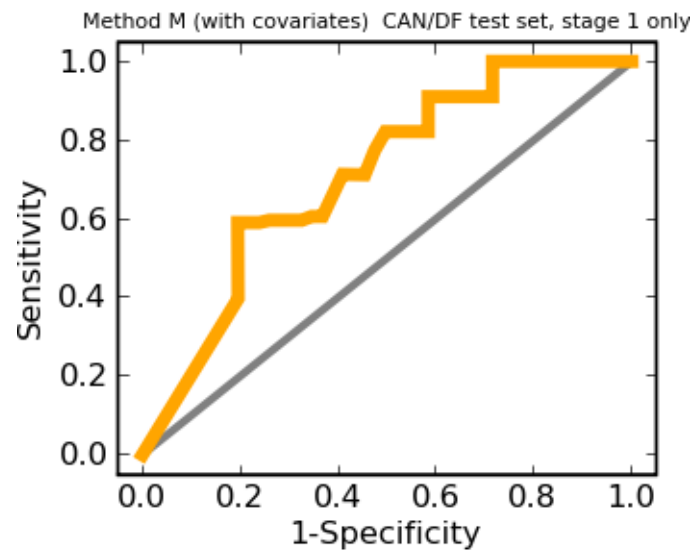

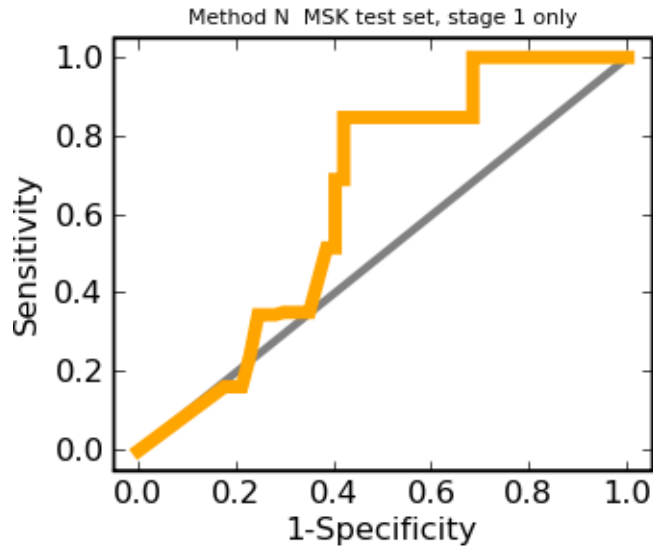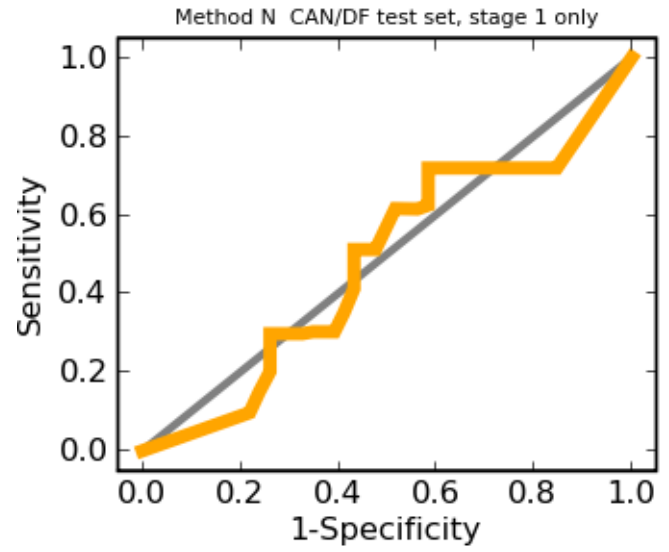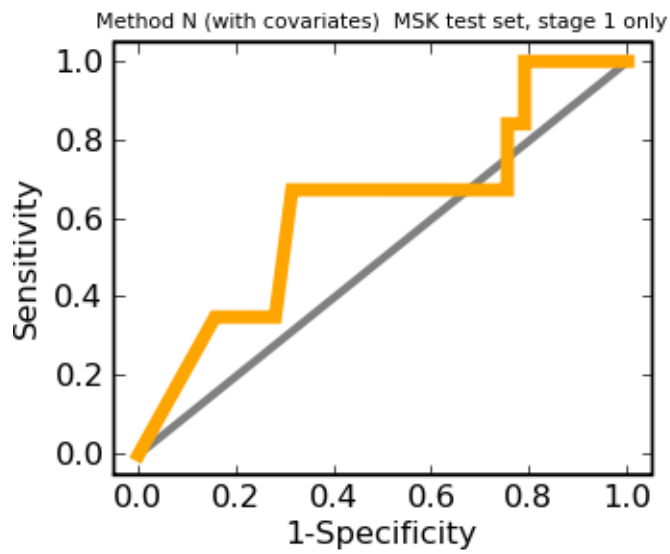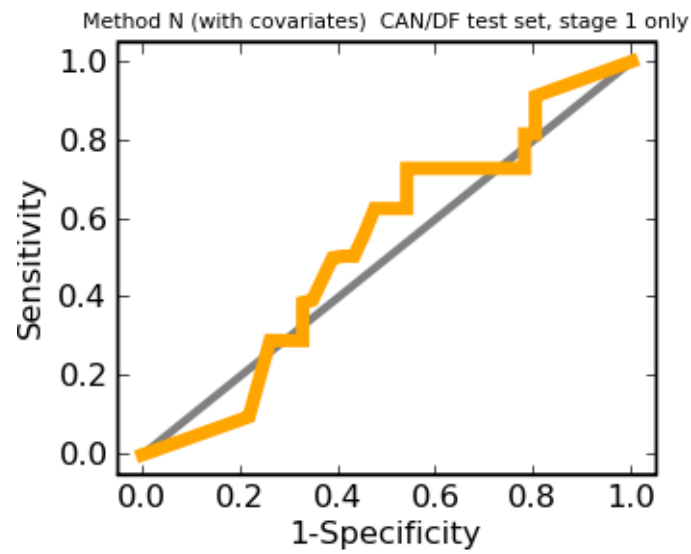

Supplement: NIHMS96850-supplement-SUP_4.pdf [file NIHMS96850-supplement-SUP_4.pdf]
